# Supplementary material for: Regiodivergent hydroallylation of 1,3-diynes controlled by nickel and palladium catalysts
Source: Royal Society of Chemistry journal article supplement (doi:10.1039/d1qo01928g), 2022-01-01

# Regiodivergent Hydroallylation of 1,3-Diynes Controlled by Nickel and Palladium Catalysts

Sheng Zhang, Hao Zhang and Zhuang-Ping Zhan\*

Department of Chemistry and Key Laboratory for Chemical Biology of Fujian Province, College of  
Chemistry and Chemical Engineering, Xiamen University, Xiamen 361005, China

[zpzh@xmu.edu.cn](mailto:zpzh@xmu.edu.cn)

## Contents

|                                                                      |    |
|----------------------------------------------------------------------|----|
| <b>S1. General methods and materials</b> .....                       | 2  |
| <b>S2. Typical procedure for the preparation of 1,3-diynes</b> ..... | 2  |
| <b>S3. General procedure for 1,3-diyne hydroallylation</b> .....     | 3  |
| <b>S4. Control experiment with Ni(0)</b> .....                       | 4  |
| <b>S5. Analytical data for compounds</b> .....                       | 5  |
| <b>S6. NMR spectra</b> .....                                         | 19 |

## S1. General methods and materials

The liquid-state NMR was recorded on a 400 or 500 MHz spectrometer. Chemical shifts were reported in ppm.  $^1\text{H}$  NMR spectra were referenced to  $\text{CDCl}_3$  (7.26 ppm), and  $^{13}\text{C}$ -NMR spectra were referenced to  $\text{CDCl}_3$  (77.0 ppm). All  $^{13}\text{C}$  NMR spectra were measured with complete proton decoupling. Peak multiplicities were designated by the following abbreviations: s, singlet; d, doublet; t, triplet; m, multiplet; brs, broad singlet and J, coupling constant in Hz.

High resolution mass spectrometry: Mass spectra were recorded with Agilent 1290-6545XT Ultra-High performance liquid chromatography-quadrupole time-of-flight mass spectrometer using electron spray ionization

All reactions were monitored by thin layer chromatography (TLC) using Macherey-Nagel 0.20 mm silica gel 60 plates. Solvents were treated prior to use according to the standard methods. If there is no special description, the reagents used in the experiment are commercial analytical pure. The 1,3-diynes were prepared according to corresponding literature procedures.<sup>[1,2]</sup>

References:

[1] Shi, W.; Lei, A. *Tetrahedron Lett.* **2014**, *55*, 2763-2772.

[2] Burghart, J.; Brückner, R. *Eur. J. Org. Chem.* **2011**, 150–165.

## S2. Typical procedure for the preparation of 1,3-diynes

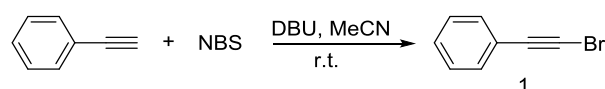

To a solution of alkyne (5.0 mmol, 1.0 equiv) in MeCN (10 mL) were added NBS (5.5 mmol, 1.1 equiv) and DBU (5.5 mmol, 1.1 equiv). The mixture was stirred at room temperature for 20 min. Then, the reaction mixture was quenched with water and extracted with  $\text{CH}_2\text{Cl}_2$  ( $3 \times 15$  mL), dried over anhydrous  $\text{Na}_2\text{SO}_4$ . The combined organic layers were concentrated under reduced pressure, and the crude product was purified by flash chromatography (petroleum ether) to give alkynyl bromide **1**.

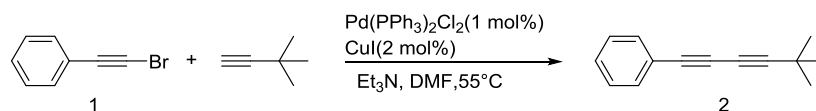

To a flame-dried round-bottom flask under  $\text{N}_2$ , alkynyl bromide **1** (5 mmol, 1.0 equiv),  $\text{PdCl}_2(\text{PPh}_3)_2$  (1 mol%) and  $\text{CuI}$  (2 mol%) were dissolved in 5 mL  $\text{Et}_3\text{N}$  and 3,3-dimethyl-1-butyne (12 mmol, 2.4 equiv) were dissolved in 5 mL DMF and the reaction mixture was stirred under  $\text{N}_2$  at  $55^\circ\text{C}$  for 12h. After the starting material was consumed completely which was detected by TLC, the reaction mixture was diluted with 20 mL dichloromethane, then washed with

saturated NaCl aqueous solution, dried over anhydrous Na<sub>2</sub>SO<sub>4</sub>. The mixture was concentrated in vacuo and purified by flash chromatography on silica gel with petroleum ether to afford the alkylation products **2**. The trimethyl(phenylbuta-1,3-diyne-1-yl)silane is synthesized in a similar way.

### S3. General procedure for 1,3-diyne hydroallylation

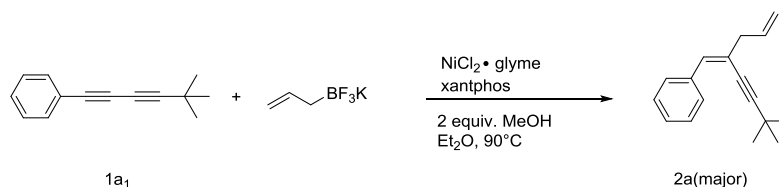

In a nitrogen filled pressure resistant reaction tube, NiCl<sub>2</sub>·glyme (0.02mmol, 10 mol%), potassium allyltrifluoroborate (0.3mmol, 1.5 equiv), xantphos (0.02mmol, 10 mol%), Et<sub>2</sub>O (2 mL), 1,3-diyne **1a**<sub>1</sub> (0.2 mmol, 1.0 equiv) and MeOH (0.4 mmol, 2.0 equiv) were successively added into the pressure resistant reaction tube under the protection of nitrogen atmosphere, and stirred at 90°C under N<sub>2</sub> atmosphere for 3 days. When the reaction was completed, the solvent was removed in vacuum. The crude product was purified directly by silica gel column chromatography eluting with petroleum ether and ethyl acetate to afford the corresponding product.

Scale-up experiments of **2a**: In a nitrogen filled pressure resistant reaction tube, NiCl<sub>2</sub>·glyme (0.2mmol, 10 mol%), potassium allyltrifluoroborate (3.0mmol, 1.5 equiv), xantphos (0.2mmol, 10 mol%), Et<sub>2</sub>O (15 mL), 1,3-diyne **1a**<sub>1</sub> (2.0mmol, 1.0 equiv, 364mg) and MeOH (4.0mmol, 2.0 equiv) were successively added into the pressure resistant reaction tube under the protection of nitrogen atmosphere, and stirred at 90°C under N<sub>2</sub> atmosphere for 5 days. When the reaction was completed, the solvent was removed in vacuum. The crude product was purified directly by silica gel column chromatography eluting with petroleum ether and ethyl acetate to afford 386mg of **2a** in 86% yield.

A small number of samples of crude products were used for NMR detection to obtain the selectivity of the reaction.

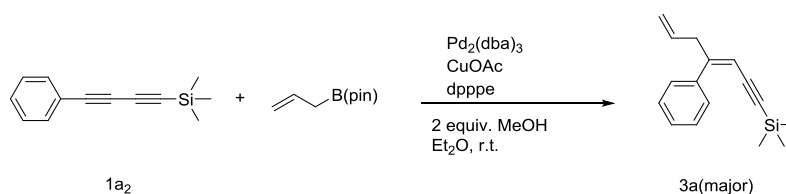

In a nitrogen filled schlenk tube, Pd<sub>2</sub>(dba)<sub>3</sub> (0.005mmol, 2.5 mol%), CuOAc (0.02 mmol, 10 mol%), dpppe (0.01mmol, 5 mol%), Et<sub>2</sub>O (2 mL), 1,3-diyne **1a**<sub>2</sub> (0.2 mmol, 1.0 equiv), allylboronic acid pinacol ester (0.3 mmol, 1.5 equiv) and MeOH (0.4 mmol, 2.0 equiv) were successively added into the schlenk tube under the protection of nitrogen atmosphere, and stirred at room temperature under N<sub>2</sub> atmosphere for 3 days. When the reaction was completed, the solvent was removed in vacuum. The crude product was purified directly by silica gel column chromatography eluting with petroleum ether and ethyl acetate to afford the corresponding product.

Scale-up experiments of **3a**: In a nitrogen filled schlenk tube, Pd<sub>2</sub>(dba)<sub>3</sub> (0.05mmol, 2.5 mol%), CuOAc (0.2 mmol, 10 mol%), dpppe (0.1mmol, 5 mol%), Et<sub>2</sub>O (15 mL), 1,3-diyne **1a**<sub>2</sub> (2.0mmol,

1.0 equiv, 397mg), allylboronic acid pinacol ester (3.0mmol, 1.5 equiv) and MeOH (4.0mmol, 2.0 equiv) were successively added into the schlenk tube under the protection of nitrogen atmosphere, and stirred at room temperature under N<sub>2</sub> atmosphere for 5 days. When the reaction was completed, the solvent was removed in vacuum. The crude product was purified directly by silica gel column chromatography eluting with petroleum ether and ethyl acetate to afford 394mg of 3a in 82% yield.

A small number of samples of crude products were used for NMR detection to obtain the selectivity of the reaction.

#### S4. Control experiment with Ni(0)

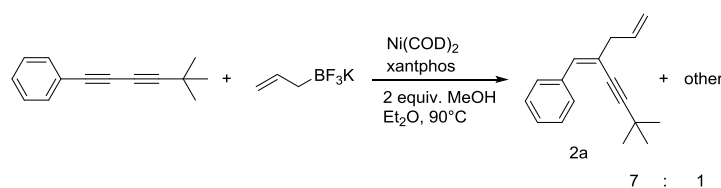

In a argon filled pressure resistant reaction tube, Ni(COD)<sub>2</sub> (0.02mmol, 10 mol%), potassium allyltrifluoroborate (0.3mmol, 1.5 equiv), xantphos (0.02mmol, 10 mol%), Et<sub>2</sub>O (2 mL), 1,3-diyne 1a<sub>1</sub> (0.2 mmol, 1.0 equiv) and MeOH (0.4 mmol, 2.0 equiv) were successively added into the pressure resistant reaction tube under the protection of argon atmosphere, and stirred at 90°C under argon atmosphere for 3 days. We have obtained the main product 2a in 32% yield (Yields were determined by <sup>1</sup>H NMR spectroscopy using 1,3,5-trimethoxy-benzene as internal standard) with poor selectivity of 7:1 (determined by <sup>1</sup>H NMR).

## S5. Analytical data for compounds

### (Z)-(2-allyl-5,5-dimethylhex-1-en-3-ynyl)benzene (2a)

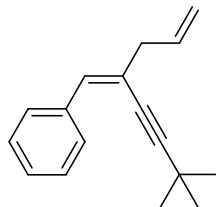

colorless liquid (82%, 37 mg);  $^1\text{H NMR}$  (500 MHz,  $\text{CDCl}_3$ )  $\delta$  7.83 (d,  $J = 7.5$  Hz, 2H), 7.33-7.29 (m, 2H), 7.24-7.21 (m, 1H), 6.46 (s, 1H), 5.95 (ddt,  $J = 17.1, 10.1, 6.8$  Hz, 1H), 5.18-5.12 (m, 1H), 5.11-5.08 (m, 1H), 3.02 (dd,  $J = 6.8, 1.2$  Hz, 2H), 1.31 (s, 9H);  $^{13}\text{C NMR}$  (125 MHz,  $\text{CDCl}_3$ )  $\delta$  136.9, 135.6, 132.9, 128.2, 127.9, 127.4, 121.1, 116.3, 105.8, 79.1, 43.9, 30.8, 28.4. **HRMS** (ESI)  $m/z$  Calculated for  $\text{C}_{17}\text{H}_{21}^+$   $[\text{M}+\text{H}]^+$  : 225.1638, found: 225.1631.

### (Z)-1-(2-allyl-5,5-dimethylhex-1-en-3-ynyl)-4-fluorobenzene (2b)

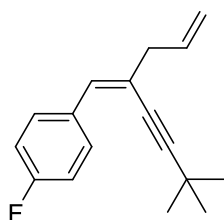

colorless liquid (73%, 35 mg);  $^1\text{H NMR}$  (500 MHz,  $\text{CDCl}_3$ )  $\delta$  7.81 (dd,  $J = 8.5, 5.7$  Hz, 2H), 6.98 (dd apparent t,  $J = 8.6$  Hz, 2H), 6.41 (s, 1H), 5.93 (ddt,  $J = 17.1, 10.2, 6.9$  Hz, 1H), 5.15-5.08 (m, 2H), 3.00 (d,  $J = 6.8$  Hz, 2H), 1.30 (s, 9H);  $^{13}\text{C NMR}$  (125 MHz,  $\text{CDCl}_3$ )  $\delta$  160.8 (d,  $J = 247.3$  Hz), 134.5, 132.07 (d,  $J = 3.1$  Hz), 130.5, 128.7 (d,  $J = 7.8$  Hz), 119.7, 115.3, 113.7 (d,  $J = 21.7$  Hz), 104.8, 77.8, 42.7, 29.7, 28.6. **HRMS** (ESI)  $m/z$  Calculated for  $\text{C}_{17}\text{H}_{20}\text{F}^+$   $[\text{M}+\text{H}]^+$  : 243.1544, found: 243.1539.

### (Z)-1-(2-allyl-5,5-dimethylhex-1-en-3-ynyl)-4-bromobenzene (2c)

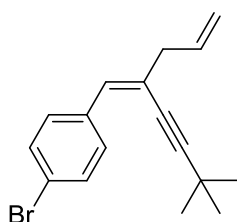

colorless liquid (76%, 46 mg);  $^1\text{H NMR}$  (500 MHz,  $\text{CDCl}_3$ )  $\delta$  7.70 (d,  $J = 8.46$  Hz, 2H), 7.42 (d,  $J = 8.59$  Hz, 2H), 6.38 (s, 1H), 5.92 (ddt,  $J = 17.2, 10.1, 6.7$  Hz, 1H), 5.15-5.08 (m, 2H), 3.01 (d,  $J = 6.8$ , 2H), 1.30 (s, 9H);  $^{13}\text{C NMR}$  (125 MHz,  $\text{CDCl}_3$ )  $\delta$  135.8, 135.3, 131.5, 131.0, 129.7, 122.0, 121.0, 116.5, 106.7, 78.9, 43.8, 30.7, 28.4. **HRMS** (ESI)  $m/z$  Calculated for  $\text{C}_{17}\text{H}_{20}\text{Br}^+$   $[\text{M}+\text{H}]^+$  : 303.0743, found: 303.0737.

**(Z)-1-(2-allyl-5,5-dimethylhex-1-en-3-ynyl)-4-ethylbenzene (2d)**

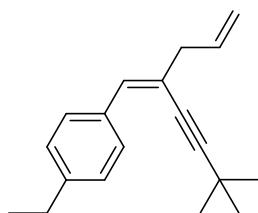

colorless liquid (87%, 44 mg);  $^1\text{H NMR}$  (500 MHz,  $\text{CDCl}_3$ )  $\delta$  7.76 (d,  $J = 8.2$  Hz, 2H), 7.14 (d,  $J = 8.1$  Hz, 2H), 6.43 (s, 1H), 5.94 (ddt,  $J = 17.1, 10.0, 6.9$  Hz, 1H), 5.13 (d,  $J = 16.9$  Hz, 1H), 5.08 (d,  $J = 10.1$  Hz, 1H), 3.01 (d,  $J = 5.9$ , 2H), 2.63 (d,  $J = 7.6$ , 2H), 1.31 (s, 9H), 1.23 (t,  $J = 7.5$ , 3H);  $^{13}\text{C NMR}$  (125 MHz,  $\text{CDCl}_3$ )  $\delta$  143.6, 135.8, 134.4, 132.8, 128.2, 127.4, 119.9, 116.1, 105.6, 79.3, 43.9, 30.8, 28.6, 28.4, 15.48. **HRMS** (ESI)  $m/z$  Calculated for  $\text{C}_{19}\text{H}_{25}^+$   $[\text{M}+\text{H}]^+$  : 253.1951, found: 253.1944.

**(Z)-1-(2-allyl-5,5-dimethylhex-1-en-3-ynyl)-4-tert-butylbenzene (2e)**

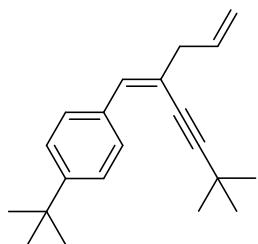

colorless liquid (84%, 47 mg);  $^1\text{H NMR}$  (500 MHz,  $\text{CDCl}_3$ )  $\delta$  7.78 (d,  $J = 8.2$  Hz, 2H), 7.32 (d,  $J = 8.1$  Hz, 2H), 6.42 (s, 1H), 5.93 (ddt,  $J = 17.2, 10.1, 6.8$  Hz, 1H), 5.14-5.06 (m, 2H), 3.00 (d,  $J = 6.7$ , 2H), 1.31 (s, 18H);  $^{13}\text{C NMR}$  (125 MHz,  $\text{CDCl}_3$ )  $\delta$  150.5, 135.8, 134.1, 132.6, 127.9, 124.8, 120.0, 116.1, 105.7, 79.3, 43.9, 34.6, 31.3, 30.9, 28.4. **HRMS** (ESI)  $m/z$  Calculated for  $\text{C}_{21}\text{H}_{29}^+$   $[\text{M}+\text{H}]^+$  : 281.2264, found: 281.2255.

**(Z)-3-(2-allyl-5,5-dimethylhex-1-en-3-ynyl)thiophene (2f)**

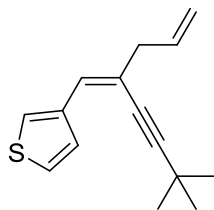

colorless liquid (83%, 38 mg); **<sup>1</sup>H NMR** (500 MHz, CDCl<sub>3</sub>) δ 7.70 (s, 1H), 7.57 (d, *J* = 4.9, 1H), 7.24-7.23 (m, 1H), 6.49 (s, 1H), 5.92 (ddt, *J* = 17.2, 10.1, 6.8 Hz, 1H), 5.13 (d, *J* = 17.1 Hz, 1H), 5.08 (d, *J* = 9.8 Hz, 1H), 2.99 (d, *J* = 6.7 Hz, 2H), 1.32 (s, 1H); **<sup>13</sup>C NMR** (125 MHz, CDCl<sub>3</sub>) δ 138.8, 135.6, 127.8, 126.9, 124.4, 123.1, 119.9, 116.2, 106.0, 79.5, 43.3, 30.8, 28.4. **HRMS** (ESI) *m/z* Calculated for C<sub>15</sub>H<sub>19</sub>S<sup>+</sup> [M+H]<sup>+</sup> : 231.1202, found: 231.1194.

**(Z)-(2-allyldec-1-en-3-ynyl)benzene (2g)**

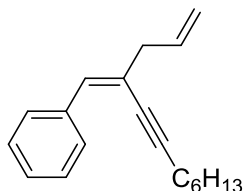

colorless liquid (47%, 25 mg); **<sup>1</sup>H NMR** (500 MHz, CDCl<sub>3</sub>) δ 7.81 (d, *J* = 7.6 Hz, 2H), 7.32-7.29 (m, 2H), 7.24-7.21 (m, 1H), 6.47 (s, 1H), 5.95 (ddt, *J* = 17.0, 10.1, 6.7 Hz, 1H), 5.15 (d, *J* = 17.0 Hz, 1H), 5.10 (d, *J* = 10.1 Hz, 1H), 3.03 (d, *J* = 6.6 Hz, 2H), 2.43 (t, *J* = 6.9 Hz, 2H), 1.62-1.55 (m, 2H), 1.47-1.42 (m, 2H), 1.34-1.28 (m, 4H), 0.90 (t, *J* = 6.8 Hz, 3H); **<sup>13</sup>C NMR** (125 MHz, CDCl<sub>3</sub>) δ 136.8, 135.7, 133.1, 128.1, 128.0, 127.4, 121.0, 116.3, 97.9, 80.5, 43.9, 31.4, 28.6, 28.6, 22.5, 19.8, 14.0. **HRMS** (ESI) *m/z* Calculated for C<sub>19</sub>H<sub>25</sub><sup>+</sup> [M+H]<sup>+</sup> : 253.1951, found: 253.1943.

**(Z)-(2-allylbut-1-en-3-yne-1,4-diyl)dibenzene (2h)**

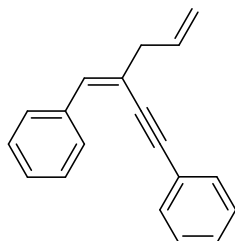

colorless solid (81%, 40 mg); **<sup>1</sup>H NMR** (500 MHz, CDCl<sub>3</sub>) δ 7.87 (d, *J* = 7.5 Hz, 2H), 7.48-7.46 (m, 2H), 7.37-7.32 (m, 5H), 7.28-7.24 (m, 1H), 6.61 (s, 1H), 6.01 (ddt, *J* = 17.1, 10.1, 6.7 Hz, 1H), 5.22 (dd, *J* = 17.2, 1.5 Hz, 1H), 5.15 (dd, *J* = 10.1, 1.1 Hz, 1H), 3.15 (dd, *J* = 6.8, 1.1 Hz, 2H); **<sup>13</sup>C**

**NMR** (125 MHz, CDCl<sub>3</sub>)  $\delta$  136.7, 135.4, 134.8, 131.5, 128.4, 128.3, 128.32, 128.2, 127.8, 123.5, 120.2, 116.7, 96.02, 89.5, 43.3. **HRMS** (ESI)  $m/z$  Calculated for C<sub>19</sub>H<sub>17</sub><sup>+</sup> [M+H]<sup>+</sup> : 245.1325, found: 245.1318.

**(Z)-4,4'-(2-allylbut-1-en-3-yne-1,4-diyl)bis(ethylbenzene) (2i)**

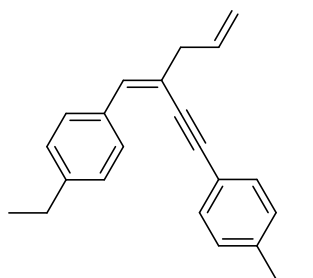

colorless solid (81%, 49 mg); **<sup>1</sup>H NMR** (500 MHz, CDCl<sub>3</sub>)  $\delta$  7.82 (d,  $J$  = 8.1 Hz, 2H), 7.41 (d,  $J$  = 8.1 Hz, 2H), 7.20-7.17 (m, 4H), 6.57 (s, 1H), 6.02 (ddt,  $J$  = 17.2, 10.2, 6.6 Hz, 1H), 5.21 (d,  $J$  = 17.2 Hz, 1H), 5.14 (d,  $J$  = 9.9 Hz, 1H), 3.14 (d,  $J$  = 6.6 Hz, 2H), 2.69-2.64 (m, 4H), 1.26-1.23 (m, 6H); **<sup>13</sup>C NMR** (125 MHz, CDCl<sub>3</sub>)  $\delta$  143.6, 143.0, 134.6, 133.3, 133.2, 130.4, 127.4, 126.9, 126.6, 119.7, 118.2, 115.4, 95.1, 88.1, 42.4, 27.8, 27.6, 14.4, 14.3. **HRMS** (ESI)  $m/z$  Calculated for C<sub>23</sub>H<sub>25</sub><sup>+</sup> [M+H]<sup>+</sup> : 301.1951, found: 301.1944.

**(Z)-4,4'-(2-allylbut-1-en-3-yne-1,4-diyl)bis(tert-butylbenzene) (2j)**

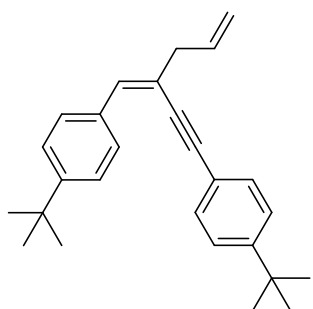

colorless solid (79%, 56 mg); **<sup>1</sup>H NMR** (500 MHz, CDCl<sub>3</sub>)  $\delta$  7.84 (d,  $J$  = 8.2 Hz, 2H), 7.44 (d,  $J$  = 8.3 Hz, 2H), 7.39-7.37 (m, 4H), 6.57 (s, 1H), 6.01 (ddt,  $J$  = 17.1, 10.2, 6.7 Hz, 1H), 5.21 (d,  $J$  = 16.9 Hz, 1H), 5.13 (d,  $J$  = 10.1 Hz, 1H), 3.13 (d,  $J$  = 6.6 Hz, 2H), 1.33 (s, 18H); **<sup>13</sup>C NMR** (125 MHz, CDCl<sub>3</sub>)  $\delta$  151.5, 150.8, 135.7, 134.2, 134.0, 131.2, 128.2, 125.3, 125.1, 120.6, 119.4, 116.4, 96.2, 89.2, 43.5, 34.8, 34.6, 31.2, 31.1. **HRMS** (ESI)  $m/z$  Calculated for C<sub>27</sub>H<sub>33</sub><sup>+</sup> [M+H]<sup>+</sup> : 357.2577, found: 357.2571.



**dimethyl 4,4'-(2-allylbut-1-en-3-yne-1,4-diyl)(Z)-dibenzoate (2k)**

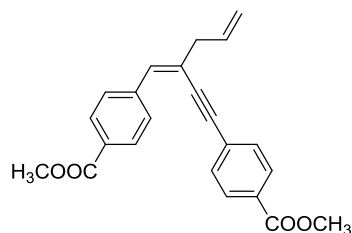

colorless solid (68%, 48 mg);  $^1\text{H NMR}$  (500 MHz,  $\text{CDCl}_3$ )  $\delta$  8.04-8.01 (m, 4H), 7.89 (d,  $J = 8.3$  Hz, 2H), 7.51 (d,  $J = 8.3$  Hz, 2H), 6.69 (s, 1H), 5.9 (ddt,  $J = 17.0, 10.1, 6.8$  Hz, 1H), 5.26-5.22 (m, 1H), 5.19-5.17 (m, 1H), 3.93 (s, 3H), 3.92 (s, 3H), 3.18 (dd,  $J = 6.6, 1.0$  Hz, 2H);  $^{13}\text{C NMR}$  (125 MHz,  $\text{CDCl}_3$ )  $\delta$  165.7, 165.4, 139.8, 133.7, 133.7, 131.4, 130.4, 128.58, 128.52, 128.2, 127.3, 126.6, 121.6, 116.3, 95.0, 90.9, 51.2, 51.0, 42.2. HRMS (ESI)  $m/z$  Calculated for  $\text{C}_{23}\text{H}_{21}\text{O}_4^+$   $[\text{M}+\text{H}]^+$  : 361.1434, found: 361.1427.

**(Z)-3,3'-(2-allylbut-1-en-3-yne-1,4-diyl) dithiophene (2l)**

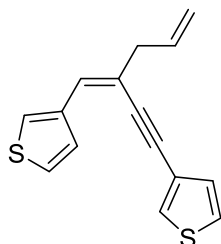

colorless solid (80%, 51 mg);  $^1\text{H NMR}$  (500 MHz,  $\text{CDCl}_3$ )  $\delta$  7.74 (s, 1H), 7.63 (d,  $J = 4.8$  Hz, 1H), 7.49 (s, 1H), 7.32-7.31 (m, 1H), 7.29-7.28 (m, 1H), 7.17 (d,  $J = 4.7$  Hz, 1H), 6.64 (s, 1H), 5.98 (ddt,  $J = 17.1, 9.9, 6.9$  Hz, 1H), 5.21 (d,  $J = 17.1$  Hz, 1H), 5.14 (d,  $J = 10.1$  Hz, 1H), 3.11 (d,  $J = 6.6$  Hz, 2H);  $^{13}\text{C NMR}$  (125 MHz,  $\text{CDCl}_3$ )  $\delta$  138.6, 135.4, 129.6, 128.8, 128.5, 127.8, 125.5, 124.9, 124.0, 122.4, 118.9, 116.7, 91.4, 89.4, 42.6. HRMS (ESI)  $m/z$  Calculated for  $\text{C}_{15}\text{H}_{13}\text{S}_2^+$   $[\text{M}+\text{H}]^+$  : 257.0453, found: 257.0447.

**(Z)-2,2'-(2-allylbut-1-en-3-yne-1,4-diyl)bis(fluorobenzene) (2m)**

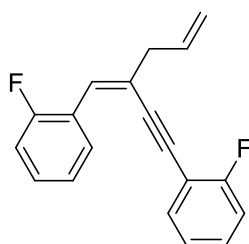

colorless solid (71%, 40 mg);  $^1\text{H NMR}$  (500 MHz,  $\text{CDCl}_3$ )  $\delta$  7.45-7.33 (m, 1H), 7.30-7.15 (m, 3H), 7.11-6.94 (m, 4H), 6.80 (s, 1H), 5.98-5.90 (m, 1H), 5.18-5.08 (m, 2H), 3.12 (d,  $J = 6.9$  Hz, 2H);  $^{13}\text{C NMR}$  (125 MHz,  $\text{CDCl}_3$ )  $\delta$  162.7 (d,  $J = 254.7$  Hz), 161.2 (d,  $J = 251.4$  Hz), 134.0, 132.3, 130.0 (d,  $J = 7.5$  Hz), 129.1 (d,  $J = 8.0$  Hz), 128.3 (d,  $J = 8.5$  Hz), 127.7, 125.5 (d,  $J = 6.6$  Hz), 123.3 (d,  $J = 11.3$  Hz), 123.0 (d,  $J = 3.6$  Hz), 122.9 (d,  $J = 3.6$  Hz), 122.6 (d,  $J = 3.6$  Hz), 116.0, 114.5 (d,  $J = 20.3$  Hz), 114.1 (d,  $J = 22.1$  Hz), 93.0, 88.8, 42.3. **HRMS** (ESI)  $m/z$  Calculated for  $\text{C}_{19}\text{H}_{15}\text{F}_2^+$   $[\text{M}+\text{H}]^+$  : 281.1136, found: 281.1131.

**(Z)-4,4'-(2-allylbut-1-en-3-yne-1,4-diyl)bis(fluorobenzene) (2n)**

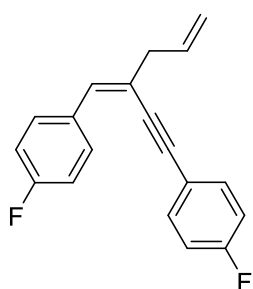

colorless solid (75%, 42 mg);  $^1\text{H NMR}$  (500 MHz,  $\text{CDCl}_3$ )  $\delta$  7.82 (dd,  $J = 8.6, 5.6$  Hz, 2H), 7.43 (dd,  $J = 8.7, 5.4$  Hz, 2H), 7.06-7.02 (m, 4H), 6.58 (s, 1H), 5.99 (ddt,  $J = 17.1, 10.1, 6.9$  Hz, 1H), 5.23-5.15 (m, 2H), 3.13 (d,  $J = 6.6$  Hz, 2H);  $^{13}\text{C NMR}$  (125 MHz,  $\text{CDCl}_3$ )  $\delta$  162.4 (d,  $J = 250.1$  Hz), 162.2 (d,  $J = 250.1$  Hz), 135.2, 133.6, 133.3 (d,  $J = 8.3$  Hz), 132.8 (d,  $J = 3.1$  Hz), 130.1 (d,  $J = 7.8$  Hz), 119.8, 119.4 (d,  $J = 3.5$  Hz), 116.8, 115.7 (d,  $J = 22.2$  Hz), 115.1 (d,  $J = 21.3$  Hz), 94.8, 88.9, 43.1. **HRMS** (ESI)  $m/z$  Calculated for  $\text{C}_{19}\text{H}_{15}\text{F}_2^+$   $[\text{M}+\text{H}]^+$  : 281.1136, found: 281.1132.

**(Z)-4-(2,2-dimethylpropylidene)-7,7-dimethyloct-1-en-5-yne (2o)**

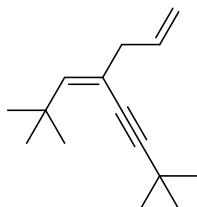

colorless solid (78%, 32 mg);  $^1\text{H NMR}$  (500 MHz,  $\text{CDCl}_3$ )  $\delta$  5.85 (ddt,  $J = 17.1, 10.0, 6.8$  Hz, 1H), 5.55 (s, 1H), 5.06-4.99 (m, 2H), 5.85 (dd,  $J = 6.8, 1.1$  Hz, 2H), 1.24 (s, 9H), 1.17 (s, 9H);  $^{13}\text{C NMR}$  (125 MHz,  $\text{CDCl}_3$ )  $\delta$  144.6, 135.4, 118.1, 114.4, 103.6, 77.1, 32.0, 31.8, 29.7, 29.5, 28.9. **HRMS** (ESI)  $m/z$  Calculated for  $\text{C}_{15}\text{H}_{25}^+$   $[\text{M}+\text{H}]^+$  : 205.1951, found: 205.1945.

**(Z)-8-allylhexadec-7-en-9-yne (2p)**

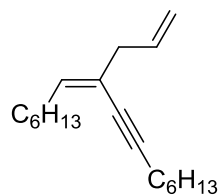

colorless liquid (83%, 52 mg);  $^1\text{H NMR}$  (500 MHz,  $\text{CDCl}_3$ )  $\delta$  5.86 (ddt,  $J = 17.1, 10.1, 6.7$  Hz, 1H), 5.60 (t,  $J = 7.3$  Hz, 1H), 5.08-5.01 (m, 2H), 2.82 (d,  $J = 6.6$  Hz, 2H), 2.34 (t,  $J = 6.9$  Hz, 2H), 2.25-2.21 (m, 2H), 1.54-1.49 (m, 2H), 1.45-1.25 (m, 14H), 0.90-0.87 (m, 6H);  $^{13}\text{C NMR}$  (125 MHz,  $\text{CDCl}_3$ )  $\delta$  136.8, 136.2, 121.4, 115.7, 94.4, 79.1, 41.7, 31.7, 31.3, 30.4, 29.1, 28.9, 28.92, 28.5, 22.6, 22.5, 19.5, 14.1, 14.0. **HRMS** (ESI)  $m/z$  Calculated for  $\text{C}_{19}\text{H}_{33}^+$   $[\text{M}+\text{H}]^+$ : 261.2577, found: 261.2569.

**(Z)-(2-allyl-5-methylhex-1-en-3-yn-1-yl)benzene (2s)**

**(Z)-(8-methylnona-1,4-dien-6-yn-4-yl)benzene (2s<sub>1</sub>) (2s and 2s<sub>1</sub> cannot be isolated)**

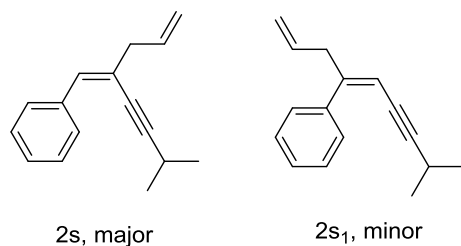

colorless liquid (72%, 32 mg);  $^1\text{H NMR}$  (500 MHz,  $\text{CDCl}_3$ ) **2s**:  $\delta$  7.83-7.81 (m, 2H), 7.47-7.45 (m, 2H), 7.24-7.20 (m, 1H), 6.46 (s, 1H), 5.94 (ddt,  $J = 17.0, 10.2, 6.7$  Hz, 1H), 5.17-5.03 (m, 2H), 3.02 (dd,  $J = 6.8, 1.1$  Hz, 2H), 2.83-2.75 (m, 1H), 1.23 (d,  $J = 6.9$ , 6H); **2s<sub>1</sub>**:  $\delta$  7.61-7.59 (m, 2H),  $\delta$  7.29-7.26 (m, 3H), 5.80 (ddt,  $J = 17.1, 10.0, 6.8$  Hz, 1H), 5.60 (s, 1H), 5.17-5.03 (m, 2H), 3.22-3.21 (m, 2H), 2.63-2.57 (m, 1H), 1.10 (d,  $J = 6.8$ , 6H);  $^{13}\text{C NMR}$  (125 MHz,  $\text{CDCl}_3$ ) **2s+2s<sub>1</sub>**:  $\delta$  136.8, 135.6, 133.0, 132.4, 128.7, 128.3, 128.1, 127.9, 127.6, 127.5, 127.4, 122.1, 120.9, 116.9, 116.3, 107.3, 103.0, 89.7, 79.7, 43.8, 41.4, 22.8, 22.4, 21.5, 21.3.

**(Z)-1-(2-allyl-5,5-dimethylhex-1-en-3-yn-1-yl)cyclohex-1-ene (2t)**

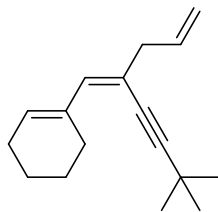

colorless liquid (36%, 17 mg); **<sup>1</sup>H NMR** (500 MHz, CDCl<sub>3</sub>) δ 5.90-5.89 (m, 1H), 5.76 (ddt, *J* = 17.2, 10.2, 6.6 Hz, 1H), 5.28 (s, 1H), 5.05-5.00 (m, 2H), 2.91 (dd, *J* = 6.7, 1.2 Hz, 2H), 2.13-2.08 (m, 4H), 1.66-1.63 (m, 2H), 1.61-1.56 (m, 2H), 1.22 (s, 9H); **<sup>13</sup>C NMR** (425 MHz, CDCl<sub>3</sub>) δ 137.8, 136.0, 129.9, 126.6, 116.2, 104.7, 91.1, 77.9, 40.5, 30.9, 30.5, 27.5, 25.4, 22.9, 22.1. **HRMS** (ESI) *m/z* Calculated for C<sub>17</sub>H<sub>25</sub><sup>+</sup> [M+H]<sup>+</sup> : 229.1951, found: 229.1958.

**(Z)-trimethyl(4-phenylhepta-3,6-dien-1-ynyl)silane (3a)**

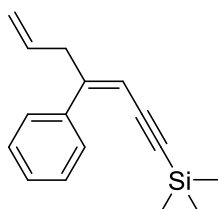

colorless liquid (81%, 41 mg); **<sup>1</sup>H NMR** (500 MHz, CDCl<sub>3</sub>) δ 7.62 (d, *J* = 7.6 Hz, 2H), 7.35-7.28 (m, 3H), 5.81 (ddt, *J* = 17.1, 10.2, 6.7 Hz, 1H), 5.63 (s, 1H), 5.11-5.05 (m, 2H), 3.23 (dd, *J* = 6.6, 1.2 Hz, 2H), 0.11 (s, 9H); **<sup>13</sup>C NMR** (125 MHz, CDCl<sub>3</sub>) δ 152.1, 139.2, 135.4, 128.2, 127.9, 117.5, 107.1, 104.1, 98.07, 41.7, -0.003. **HRMS** (ESI) *m/z* Calculated for C<sub>16</sub>H<sub>21</sub>Si<sup>+</sup> [M+H]<sup>+</sup> : 241.1407, found: 241.1401.

**(Z)-(4-(4-bromophenyl)hepta-3,6-dien-1-ynyl)trimethylsilane (3b)**

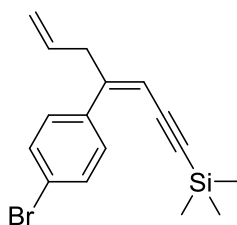

colorless solid (82%, 52 mg); **<sup>1</sup>H NMR** (500 MHz, CDCl<sub>3</sub>) δ 7.51 (d, *J* = 8.1 Hz, 2H), 7.45 (d, *J* = 8.1 Hz, 2H), 5.80-5.72 (m, 1H), 5.65 (s, 1H), 5.09-5.06 (m, 2H), 3.19 (d, *J* = 6.4 Hz, 2H), 0.12 (s, 9H); **<sup>13</sup>C NMR** (100 MHz, CDCl<sub>3</sub>) δ 149.2, 136.8, 133.8, 129.8, 128.6, 120.9, 116.5, 106.5, 102.4,

97.7, 40.3, -0.003. **HRMS** (ESI)  $m/z$  Calculated for  $C_{16}H_{20}BrSi^+$   $[M+H]^+$  : 319.0512, found: 319.0507.

**(Z)-(4-(4-chlorophenyl)hepta-3,6-dien-1-ynyl)trimethylsilane (3c)**

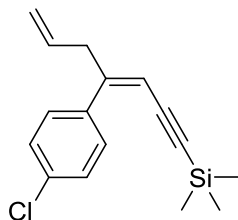

colorless solid (81%, 44 mg);  **$^1H$  NMR** (500 MHz,  $CDCl_3$ )  $\delta$  7.57 (d,  $J$  = 8.8 Hz, 2H), 7.30 (d,  $J$  = 8.7 Hz, 2H), 5.7 (ddt,  $J$  = 17.1, 10.3, 6.6 Hz, 1H), 5.65 (s, 1H), 5.10-5.06 (m, 2H), 3.23 (dd,  $J$  = 6.4, 1.1 Hz, 2H), 0.13 (s, 9H);  **$^{13}C$  NMR** (100 MHz,  $CDCl_3$ )  $\delta$  150.5, 137.6, 135.1, 133.9, 129.6, 128.2, 117.8, 107.7, 103.7, 98.9, 41.6, -0.003. **HRMS** (ESI)  $m/z$  Calculated for  $C_{16}H_{20}ClSi^+$   $[M+H]^+$  : 275.1017, found: 275.1011.

**(Z)-methyl 4-(1-(trimethylsilyl)hepta-3,6-dien-1-yn-4-yl)benzoate (3d)**

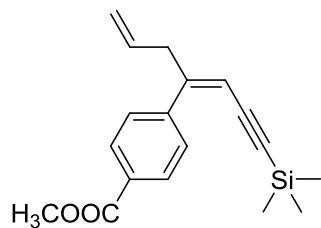

colorless solid (71%, 42 mg);  **$^1H$  NMR** (500 MHz,  $CDCl_3$ )  $\delta$  8.01 (d,  $J$  = 8.3 Hz, 2H), 7.67 (d,  $J$  = 8.3 Hz, 2H), 5.7 (ddt,  $J$  = 17.3, 10.2, 6.5 Hz, 1H), 5.71 (s, 1H), 5.10-5.06 (m, 2H), 3.92 (s, 3H), 3.23 (d,  $J$  = 6.5 Hz, 2H), 0.11 (s, 9H);  **$^{13}C$  NMR** (100 MHz,  $CDCl_3$ )  $\delta$  167.1, 150.8, 143.9, 134.9, 129.3, 128.5, 128.3, 117.9, 108.7, 103.5, 99.4, 52.4, 41.6, -0.003. **HRMS** (ESI)  $m/z$  Calculated for  $C_{18}H_{23}O_2Si^+$   $[M+H]^+$  : 299.1462, found: 299.1458.

**(Z)-(4-(4-methoxyphenyl)hepta-3,6-dien-1-ynyl)trimethylsilane (3e)**

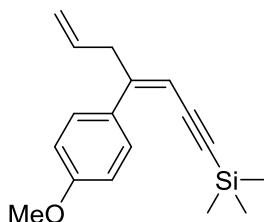

colorless liquid (62%, 33 mg);  $^1\text{H NMR}$  (500 MHz,  $\text{CDCl}_3$ )  $\delta$  7.64 (d,  $J = 8.5$  Hz, 2H), 6.86 (d,  $J = 8.5$  Hz, 2H), 5.80 (ddt,  $J = 17.2, 10.1, 6.6$  Hz, 1H), 5.57 (s, 1H), 5.10-5.04 (m, 2H), 3.82 (s, 3H), 3.21 (d,  $J = 6.4$  Hz, 2H), 0.14 (s, 9H);  $^{13}\text{C NMR}$  (100 MHz,  $\text{CDCl}_3$ )  $\delta$  159.5, 151.1, 135.6, 131.4, 129.5, 117.3, 113.2, 105.6, 104.5, 97.8, 55.4, 41.6, -0.003. **HRMS** (ESI)  $m/z$  Calculated for  $\text{C}_{17}\text{H}_{23}\text{OSi}^+$   $[\text{M}+\text{H}]^+$  : 271.1518, found: 271.1514.

**(Z)-(4-(biphenyl-4-yl)hepta-3,6-dien-1-ynyl)trimethylsilane (3f)**

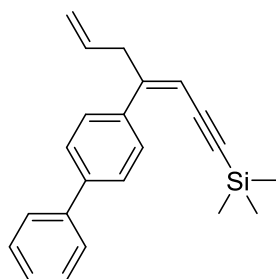

colorless solid (76%, 48 mg);  $^1\text{H NMR}$  (500 MHz,  $\text{CDCl}_3$ )  $\delta$  7.75 (d,  $J = 8.5$  Hz, 2H), 7.61 (d,  $J = 7.2$  Hz, 2H), 7.57 (d,  $J = 8.5$  Hz, 2H), 7.46-7.43 (m, 2H), 7.36-7.34 (m, 2H), 5.8 (ddt,  $J = 17.1, 10.2, 6.7$  Hz, 1H), 5.67 (s, 1H), 5.14-5.08 (m, 2H), 3.28 (dd,  $J = 6.5, 1.1$  Hz, 2H), 0.14 (s, 9H);  $^{13}\text{C NMR}$  (100 MHz,  $\text{CDCl}_3$ )  $\delta$  151.2, 140.9, 138.0, 135.4, 128.9, 128.6, 127.5, 127.2, 126.8, 126.6, 117.6, 107.1, 104.2, 98.5, 41.6, -0.003. **HRMS** (ESI)  $m/z$  Calculated for  $\text{C}_{22}\text{H}_{25}\text{Si}^+$   $[\text{M}+\text{H}]^+$  : 317.1720, found: 317.1714.

**(Z)-trimethyl(4-(thiophen-3-yl)hepta-3,6-dien-1-ynyl)silane (3g)**

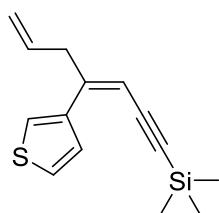

colorless liquid (80%, 39 mg);  $^1\text{H NMR}$  (500 MHz,  $\text{CDCl}_3$ )  $\delta$  7.81 (s, 1H), 7.72 (dd,  $J = 5.2, 1.5$  Hz, 1H), 7.27-7.25 (m, 1H), 5.8 (ddt,  $J = 17.1, 10.2, 6.6$  Hz, 1H), 5.57 (s, 1H), 5.13-5.08 (m, 2H), 3.22 (dd,  $J = 6.6, 1.2$  Hz, 2H), 0.20 (s, 9H);  $^{13}\text{C NMR}$  (100 MHz,  $\text{CDCl}_3$ )  $\delta$  144.9, 140.0, 135.6, 127.6, 124.8, 124.5, 117.5, 105.6, 104.8, 100.2, 41.6, -0.003. **HRMS** (ESI)  $m/z$  Calculated for  $\text{C}_{14}\text{H}_{19}\text{SSi}^+$   $[\text{M}+\text{H}]^+$  : 247.0971, found: 247.0964.

**(Z)-triisopropyl(4-phenylhepta-3,6-dien-1-ynyl)silane (3h)**

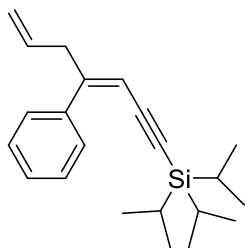

colorless liquid (81%, 52 mg); **<sup>1</sup>H NMR** (500 MHz, CDCl<sub>3</sub>) δ 7.60-7.58 (m, 2H), 7.32-7.29 (m, 2H), 7.26-7.25 (m, 1H), 7.27-7.25 (m, 1H), 5.7 (ddt, *J* = 17.2, 10.1, 6.8 Hz, 1H), 5.67 (s, 1H), 5.11-5.06 (m, 2H), 3.22 (dd, *J* = 6.8, 1.3 Hz, 2H), 0.99 (s, 21H); **<sup>13</sup>C NMR** (100 MHz, CDCl<sub>3</sub>) δ 151.6, 139.3, 135.1, 127.9, 127.8, 127.7, 117.3, 107.2, 105.2, 94.1, 41.6, 18.5, 11.2. **HRMS** (ESI) *m/z* Calculated for C<sub>22</sub>H<sub>33</sub>Si<sup>+</sup> [M+H]<sup>+</sup> : 325.2346, found: 325.2341.

**(Z)-undeca-1,4-dien-6-yn-4-ylbenzene (3i)**

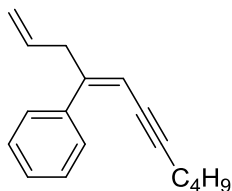

colorless liquid (42%, 30 mg); **<sup>1</sup>H NMR** (500 MHz, CDCl<sub>3</sub>) δ 7.47 (d, *J* = 6.5 Hz, 2H), 7.40 (d, *J* = 6.4 Hz, 2H), 7.32-7.26 (m, 1H), 5.79 (ddt, *J* = 17.1, 10.0, 6.6 Hz, 1H), 5.51 (s, 1H), 5.11-5.08 (m, 2H), 2.87 (d, *J* = 6.93 Hz, 2H), 2.40 (t, *J* = 7.8 Hz, 2H), 1.51-1.43 (m, 2H), 1.41-1.34 (m, 2H), 0.94 (t, *J* = 6.6 Hz, 3H); **<sup>13</sup>C NMR** (100 MHz, CDCl<sub>3</sub>) δ 154.9, 135.3, 132.5, 128.7, 128.3, 128.2, 127.6, 117.9, 105.6, 92.2, 40.5, 33.0, 21.9, 19.2, 13.5. **HRMS** (ESI) *m/z* Calculated for C<sub>17</sub>H<sub>21</sub><sup>+</sup> [M+H]<sup>+</sup> : 225.1638, found: 225.1631.

**(Z)-(8,8-dimethylnona-1,4-dien-6-yn-4-yl)benzene (3j)**

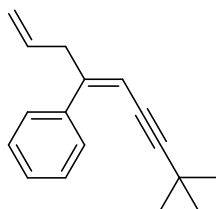

colorless liquid (62%, 38 mg); **<sup>1</sup>H NMR** (500 MHz, CDCl<sub>3</sub>) δ 7.61 (d, *J* = 7.2 Hz, 2H), 7.33-7.30 (m, 2H), 7.27-7.25 (m, 1H), 5.8 (ddt, *J* = 17.2, 10.1, 6.6 Hz, 1H), 5.60 (s, 1H), 5.09-5.03 (m, 2H), 3.21 (dd, *J* = 6.6, 1.3 Hz, 2H), 1.16 (s, 9H); **<sup>13</sup>C NMR** (100 MHz, CDCl<sub>3</sub>) δ 148.5, 139.4, 135.6,

127.9, 127.6, 127.5, 116.9, 107.4, 101.5, 77.6, 41.4, 30.7, 28.1. **HRMS** (ESI)  $m/z$  Calculated for  $C_{17}H_{21}^+$   $[M+H]^+$  : 225.1638, found: 225.1632.

**(Z)-hepta-3,6-dien-1-yne-1,4-diyl dibenzene (3k)**

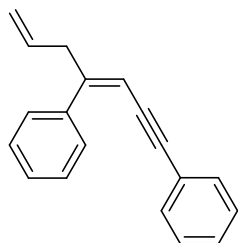

colorless solid (84%, 41 mg);  **$^1H$  NMR** (500 MHz,  $CDCl_3$ )  $\delta$  7.65 (d,  $J = 7.7$  Hz, 2H), 7.40-7.36 (m, 2H), 7.32-7.24 (m, 6H), 5.89-5.83 (m, 1H), 5.81 (s, 1H), 5.14-5.08 (m, 2H), 3.29 (d,  $J = 6.7$  Hz, 2H);  **$^{13}C$  NMR** (100 MHz,  $CDCl_3$ )  $\delta$  150.7, 139.4, 135.2, 131.3, 128.2, 128.0, 127.9, 127.87, 127.85, 123.7, 117.2, 106.9, 92.0, 88.4, 41.7. **HRMS** (ESI)  $m/z$  Calculated for  $C_{19}H_{17}^+$   $[M+H]^+$  : 245.1325, found: 245.1318.

**(Z)-4,4'-(hepta-3,6-dien-1-yne-1,4-diyl)bis(tert-butylbenzene) (3l)**

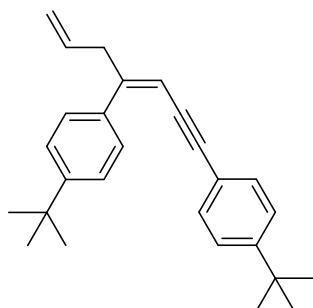

colorless solid (77%, 55 mg);  **$^1H$  NMR** (500 MHz,  $CDCl_3$ )  $\delta$  7.84 (d,  $J = 8.2$  Hz, 2H), 7.44 (d,  $J = 8.3$  Hz, 2H), 7.39-7.37 (m, 4H), 6.57 (s, 1H), 6.01 (ddt,  $J = 17.1, 10.2, 6.7$  Hz, 1H), 5.21 (d,  $J = 16.9$  Hz, 1H), 5.13 (d,  $J = 10.1$  Hz, 1H), 3.13 (d,  $J = 6.6$  Hz, 2H), 1.33 (s, 18H);  **$^{13}C$  NMR** (100 MHz,  $CDCl_3$ )  $\delta$  151.5, 150.8, 135.7, 134.2, 134.0, 131.2, 128.2, 125.3, 125.1, 120.6, 119.4, 116.4, 96.2, 89.2, 43.5, 34.8, 34.6, 31.2, 31.1. **HRMS** (ESI)  $m/z$  Calculated for  $C_{27}H_{33}^+$   $[M+H]^+$  : 357.2577, found: 357.2571.

**(Z)-4,4'-(hepta-3,6-dien-1-yne-1,4-diyl)bis(methoxybenzene) (3m)**



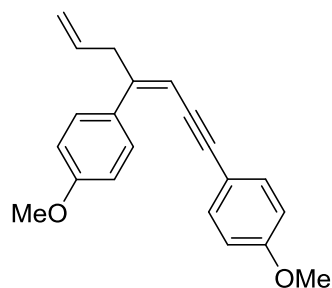

colorless solid (68%, 41 mg);  $^1\text{H NMR}$  (500 MHz,  $\text{CDCl}_3$ )  $\delta$  7.61 (d,  $J = 8.5$  Hz, 2H), 7.39 (d,  $J = 8.8$  Hz, 2H), 6.8 (d,  $J = 8.5$  Hz, 2H), 6.7 (d,  $J = 8.7$  Hz, 2H), 5.7 (ddt,  $J = 17.1, 10.1, 6.7$  Hz, 1H), 5.68 (s, 1H), 5.06-4.99 (m, 2H), 3.76 (s, 3H), 3.75 (s, 3H), 3.19 (d,  $J = 6.5$  Hz, 2H);  $^{13}\text{C NMR}$  (100 MHz,  $\text{CDCl}_3$ )  $\delta$  159.2, 158.2, 147.7, 134.6, 133.0, 131.6, 130.7, 128.3, 115.9, 113.1, 112.9, 112.1, 104.8, 86.4, 54.2, 40.6. **HRMS** (ESI)  $m/z$  Calculated for  $\text{C}_{21}\text{H}_{21}\text{O}_2^+$   $[\text{M}+\text{H}]^+$  : 305.1536, found: 305.1531.

**(Z)-3,3'-(hepta-3,6-dien-1-yne-1,4-diyl)dithiophene (3n)**

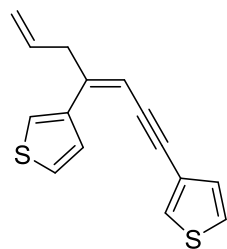

colorless solid (83%, 42 mg);  $^1\text{H NMR}$  (500 MHz,  $\text{CDCl}_3$ )  $\delta$  7.79 (d,  $J = 2.99$  Hz, 1H), 7.72 (d,  $J = 5.16$  Hz, 1H), 7.41 (d,  $J = 3.01$  Hz, 1H), 7.30-7.289 (m, 1H), 7.282-7.26 (m, 1H), 7.10 (d,  $J = 5.13$  Hz, 1H), 5.9 (ddt,  $J = 17.3, 10.3, 6.5$  Hz, 1H), 5.75 (s, 1H), 5.17-5.10 (m, 2H), 3.28 (dd,  $J = 6.7, 1.1$  Hz, 2H);  $^{13}\text{C NMR}$  (100 MHz,  $\text{CDCl}_3$ )  $\delta$  143.5, 140.0, 135.6, 129.5, 128.0, 127.4, 125.3, 124.5, 124.2, 122.7, 117.2, 105.4, 89.2, 88.4, 41.5. **HRMS** (ESI)  $m/z$  Calculated for  $\text{C}_{15}\text{H}_{13}\text{S}_2^+$   $[\text{M}+\text{H}]^+$  : 257.0543, found: 257.0536.

**(Z)-dimethyl 4,4'-(hepta-3,6-dien-1-yne-1,4-diyl)dibenzoate (3o)**

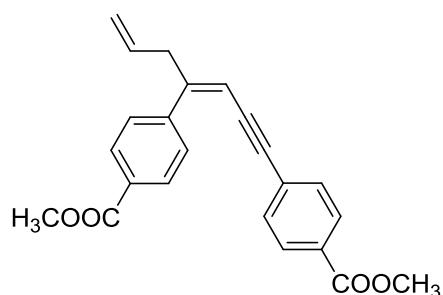

colorless solid (74%, 53 mg); **<sup>1</sup>H NMR** (500 MHz, CDCl<sub>3</sub>) δ 8.06 (d, *J* = 8.1 Hz, 2H), 7.93 (d, *J* = 8.4 Hz, 2H), 7.68 (d, *J* = 8.4 Hz, 2H), 7.31 (d, *J* = 8.5 Hz, 2H), 5.91 (s, 1H), 5.8 (ddt, *J* = 17.1, 10.2, 6.6 Hz, 1H), 5.15-5.11 (m, 2H), 3.93 (s, 3H), 3.90 (s, 3H), 3.31 (d, *J* = 6.7 Hz, 2H); **<sup>13</sup>C NMR** (100 MHz, CDCl<sub>3</sub>) δ 165.8, 165.5, 150.0, 142.9, 133.5, 130.4, 130.1, 128.7, 128.4, 128.2, 127.3, 127.0, 124.9, 116.8, 107.0, 89.7, 51.18, 51.14, 40.5. **HRMS** (ESI) *m/z* Calculated for C<sub>23</sub>H<sub>21</sub>O<sub>4</sub><sup>+</sup> [M+H]<sup>+</sup> : 361.1434, found: 361.1428.

## S5. NMR spectra

### (Z)-(2-allyl-5,5-dimethylhex-1-en-3-ynyl)benzene (2a)

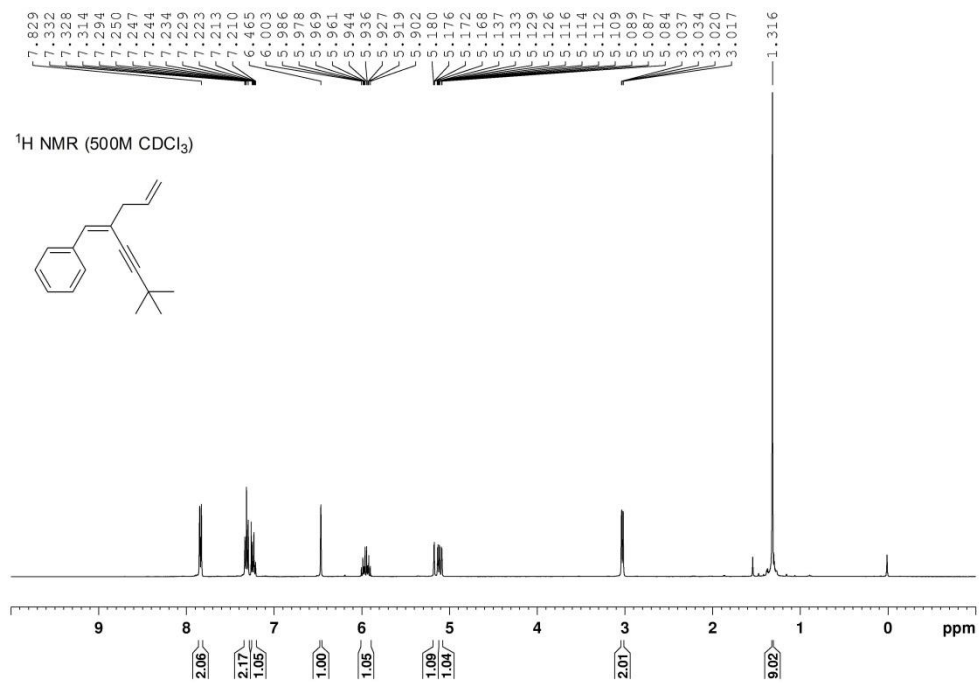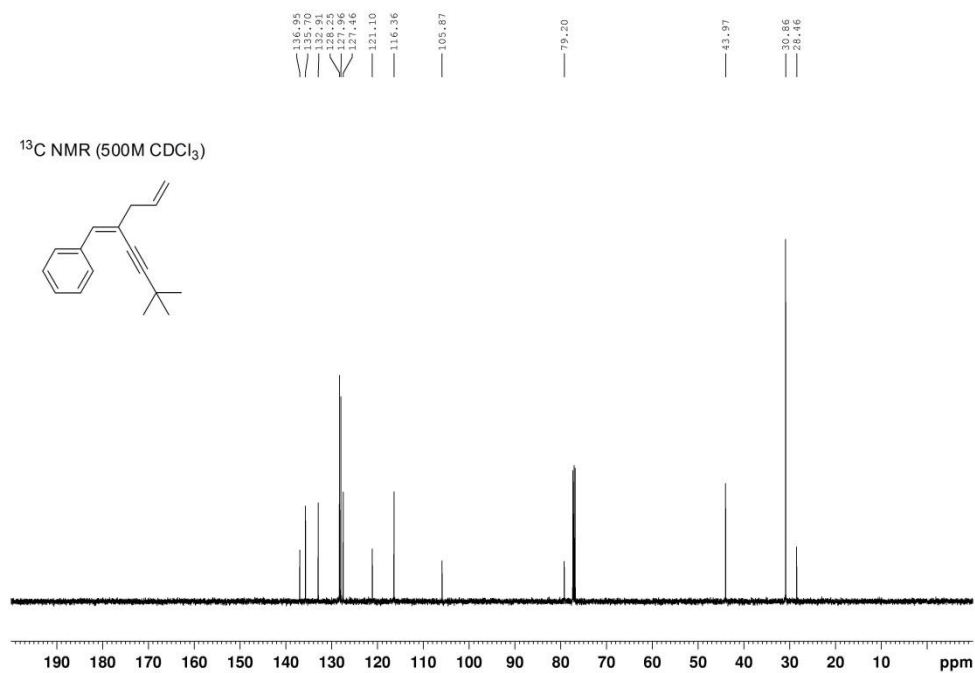

**(Z)-(2-allyl-5,5-dimethylhex-1-en-3-ynyl)benzene (NOE of 2a)**

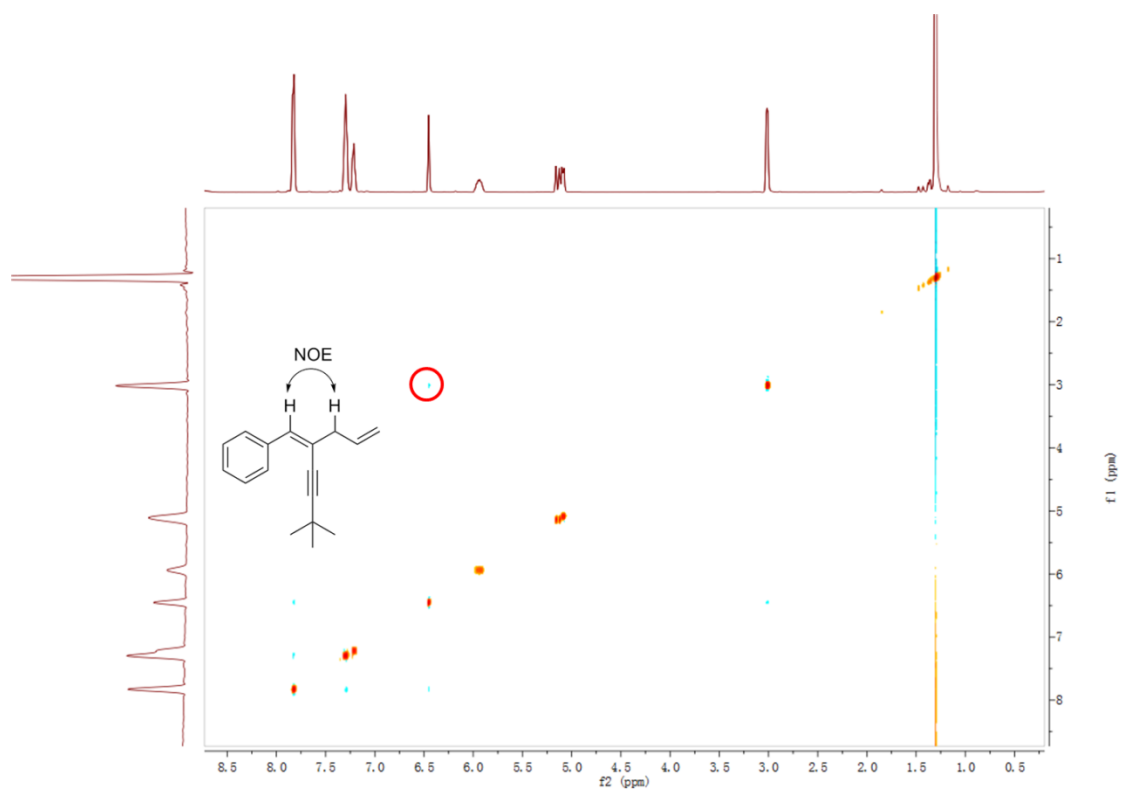

**(Z)-1-(2-allyl-5,5-dimethylhex-1-en-3-ynyl)-4-fluorobenzene (2b)**

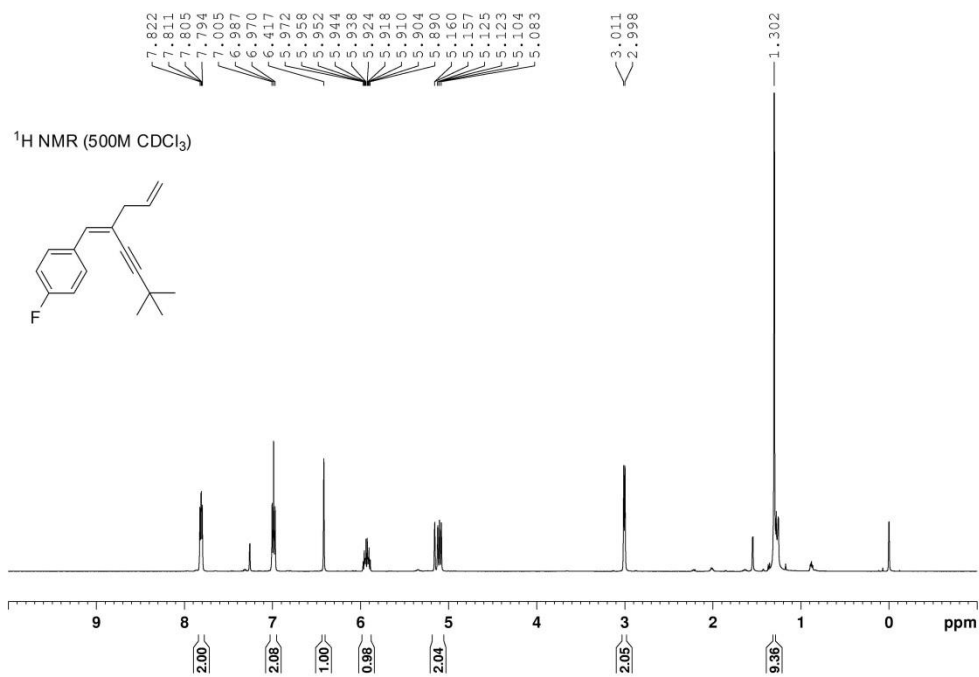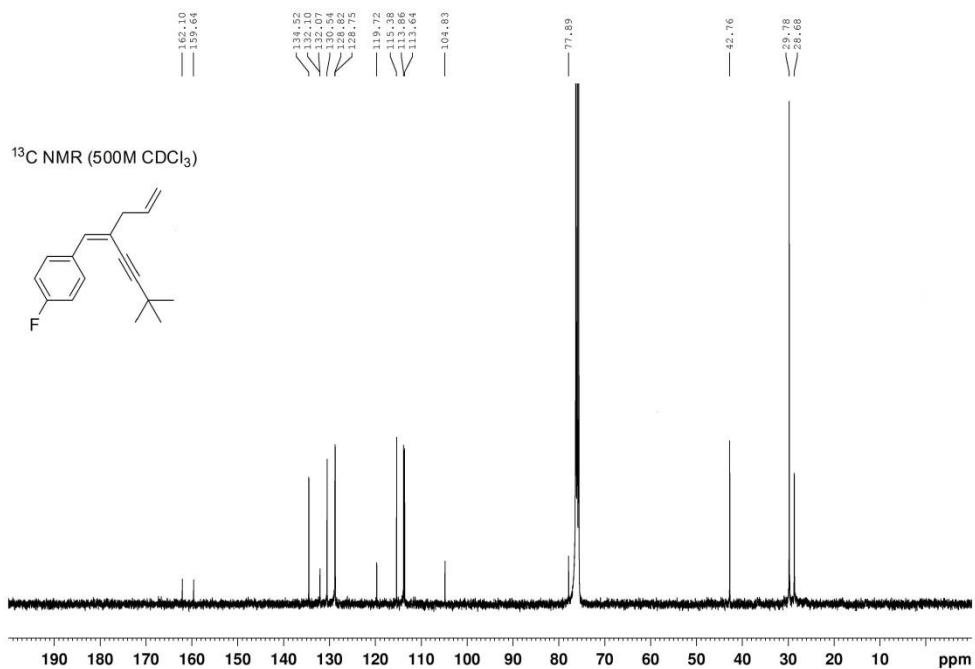

**(Z)-1-(2-allyl-5,5-dimethylhex-1-en-3-ynyl)-4-bromobenzene (2c)**

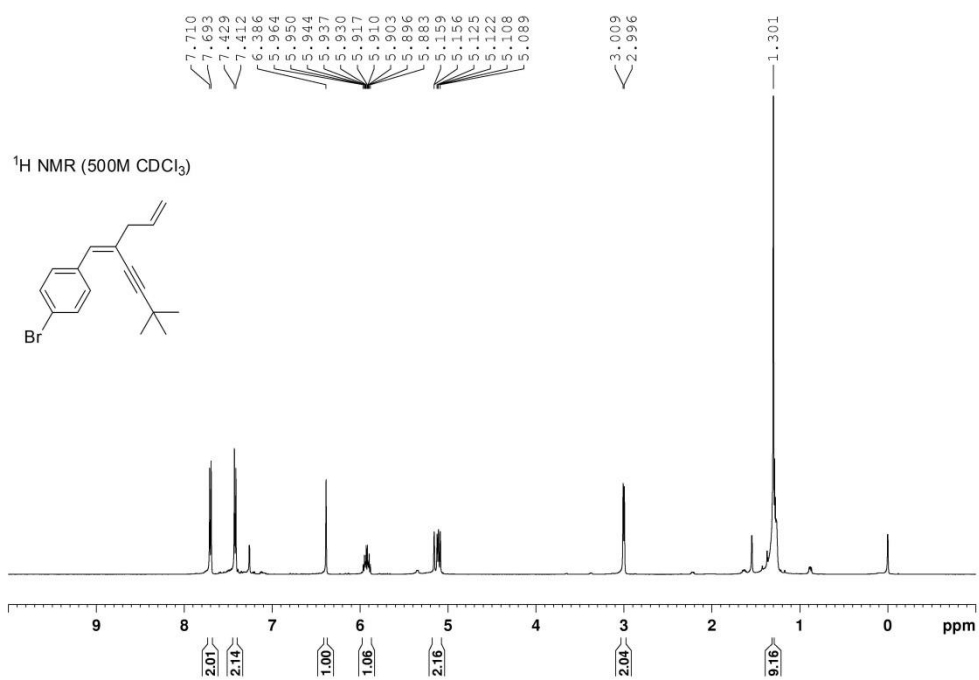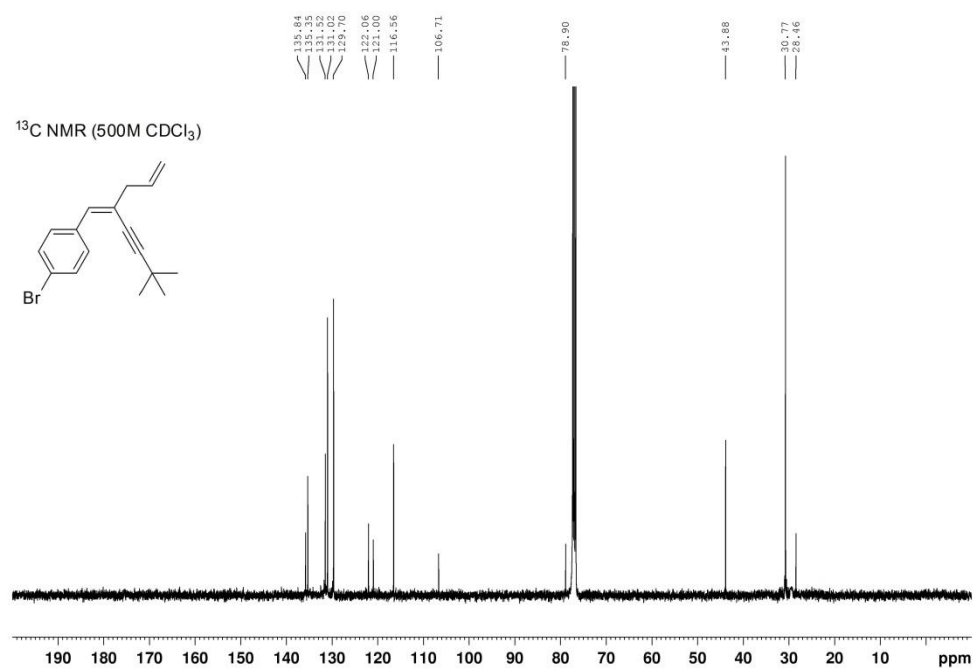

**(Z)-1-(2-allyl-5,5-dimethylhex-1-en-3-ynyl)-4-ethylbenzene (2d)**

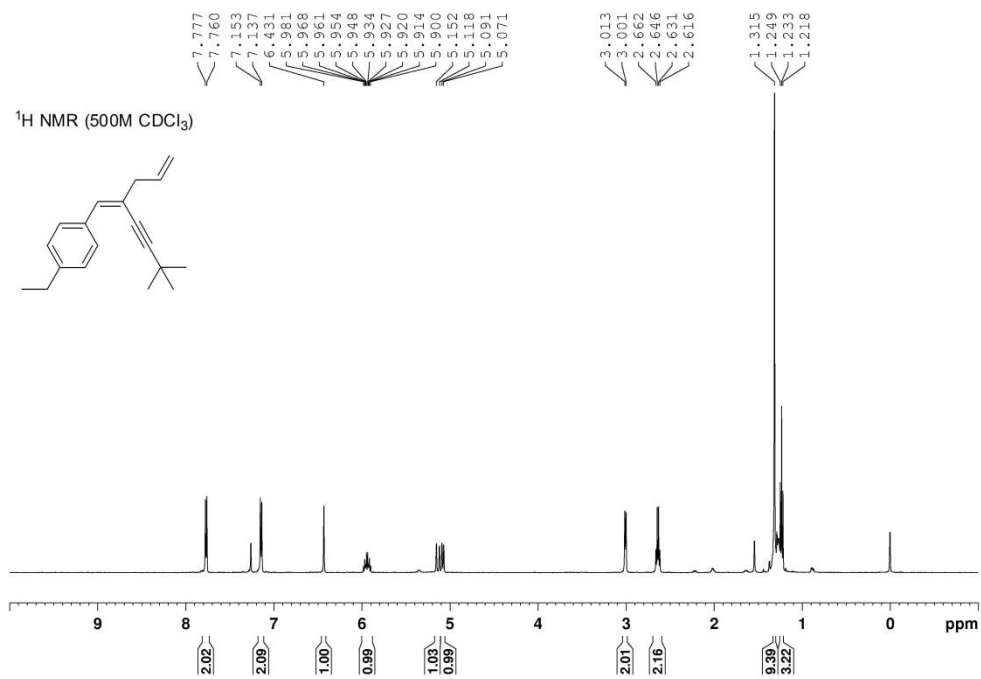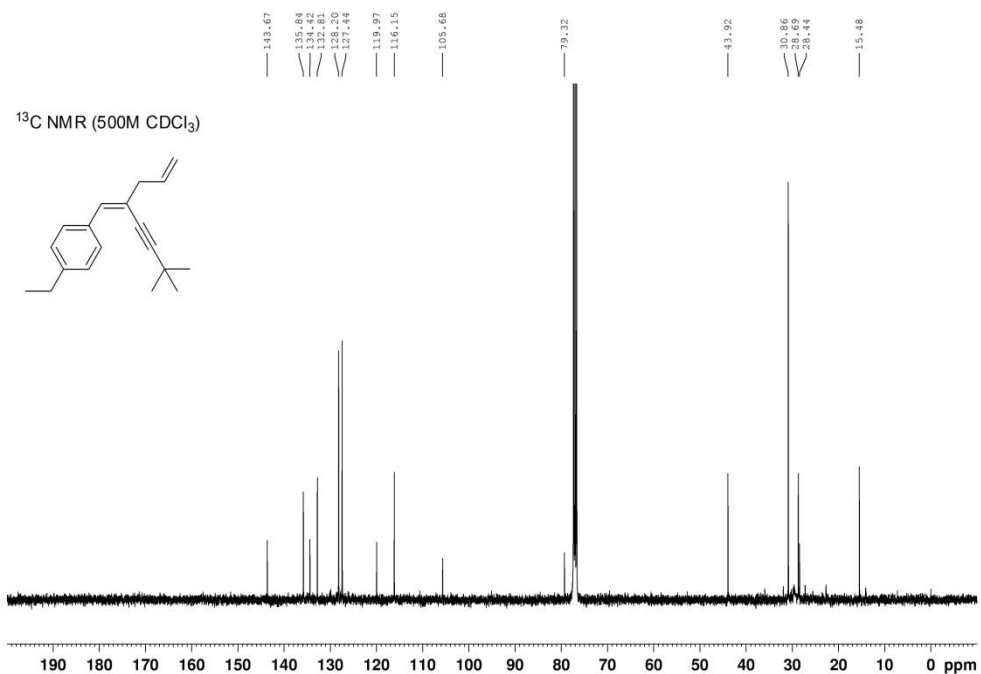

**(Z)-1-(2-allyl-5,5-dimethylhex-1-en-3-ynyl)-4-tert-butylbenzene (2e)**

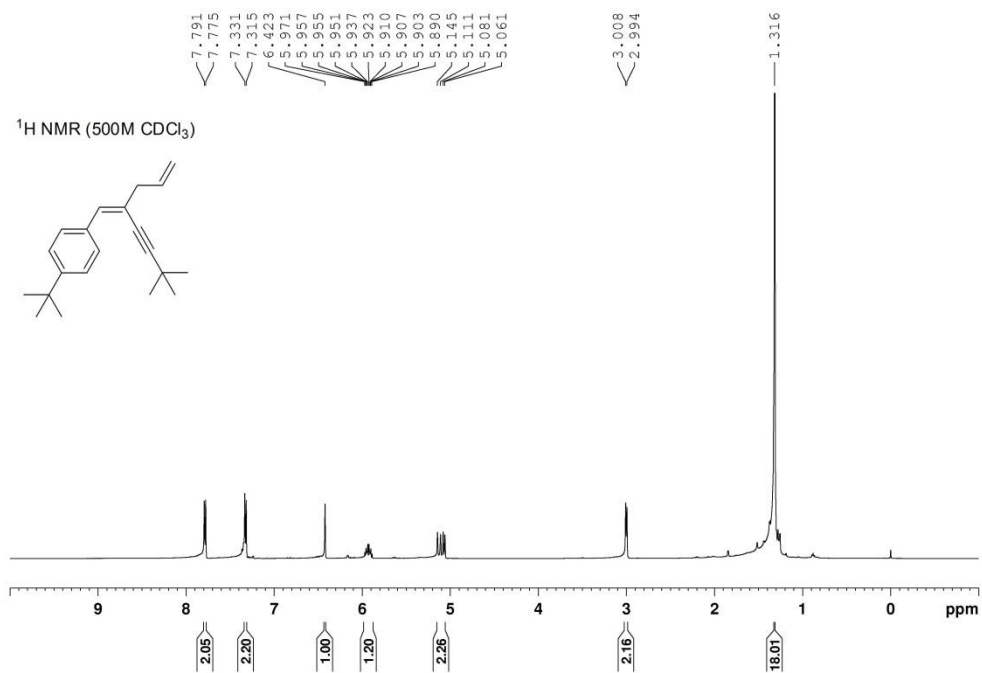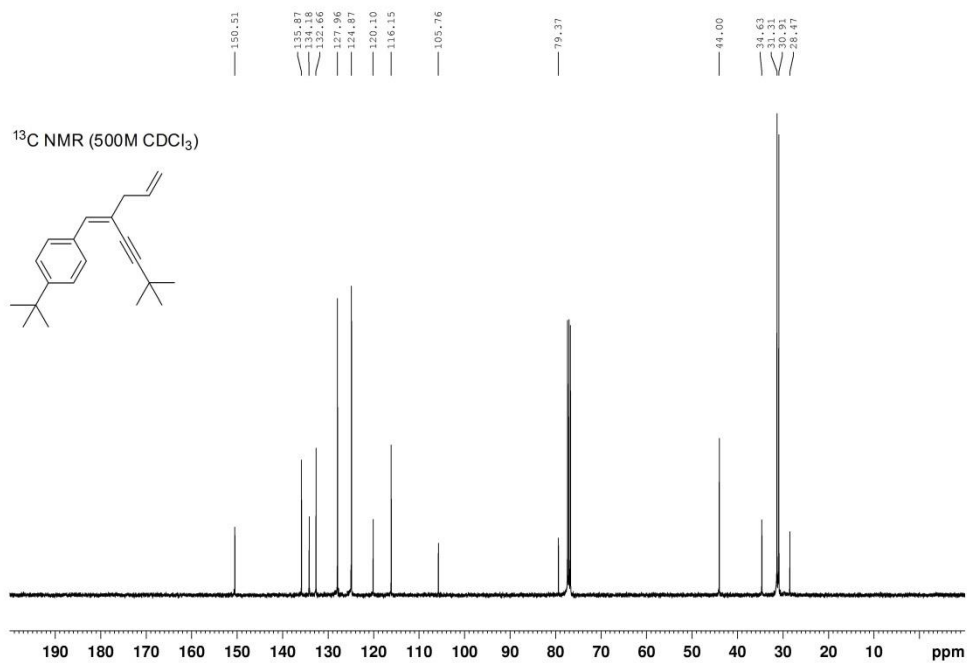



**(Z)-3-(2-allyl-5,5-dimethylhex-1-en-3-ynyl)thiophene (2f)**

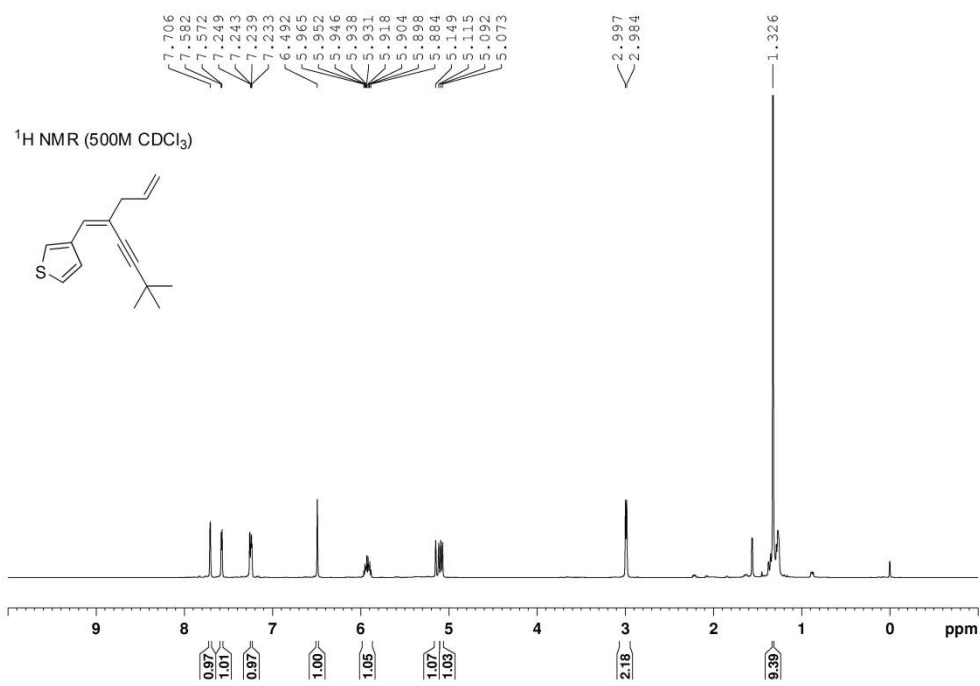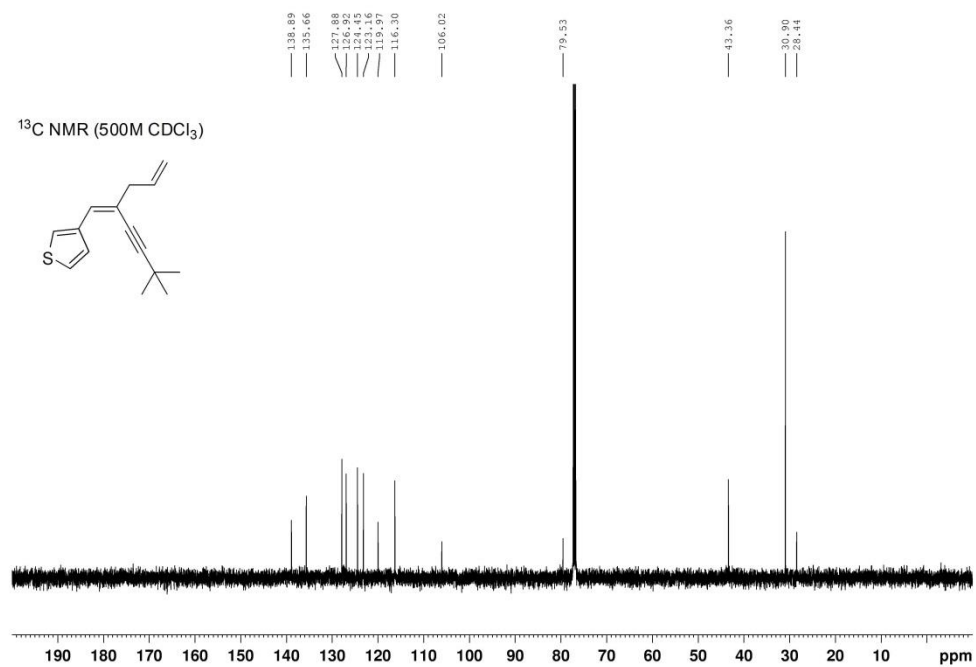

# (Z)-(2-allyldec-1-en-3-ynyl)benzene (2g)

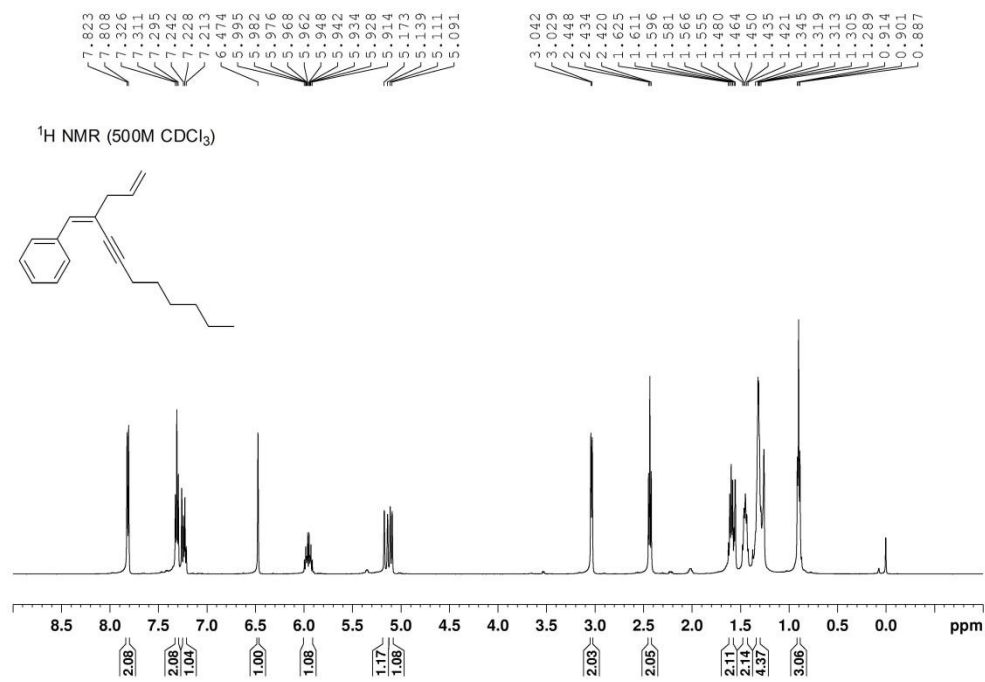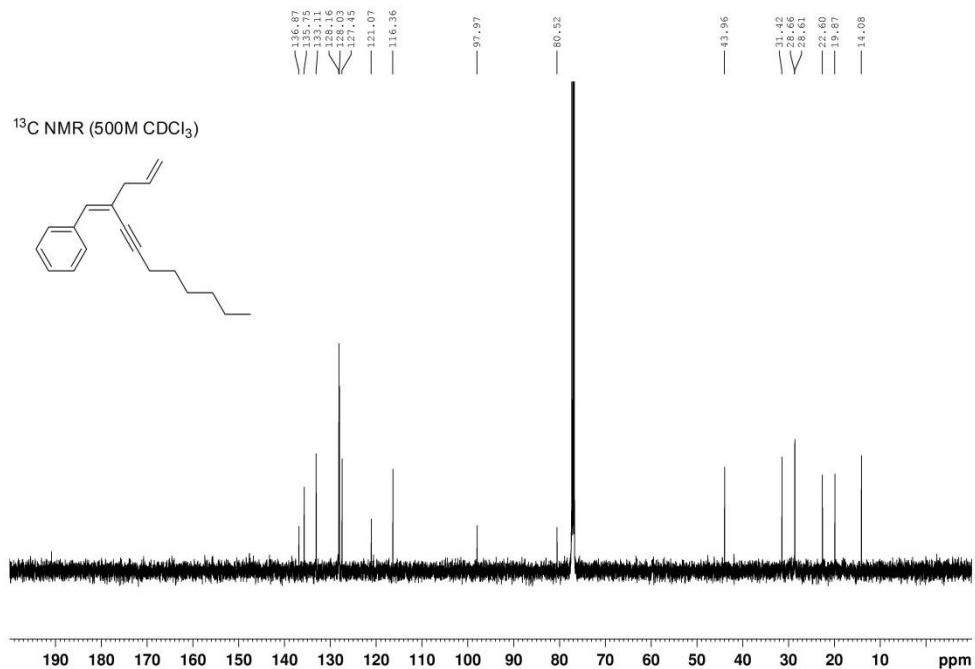

**(Z)-(2-allylbut-1-en-3-yn-1,4-diyl)dibenzene (2h)**

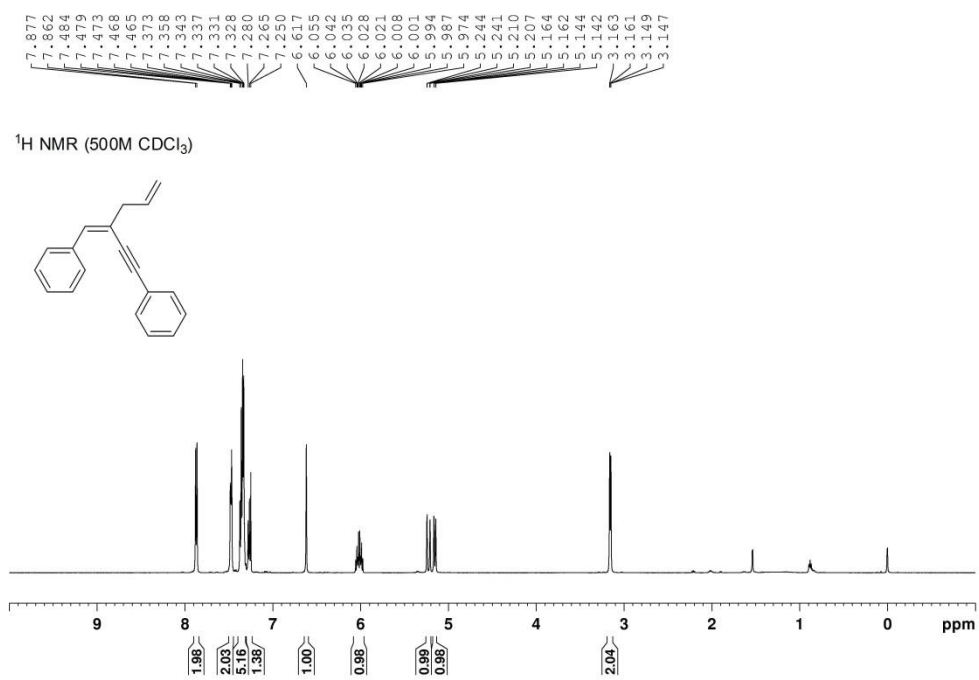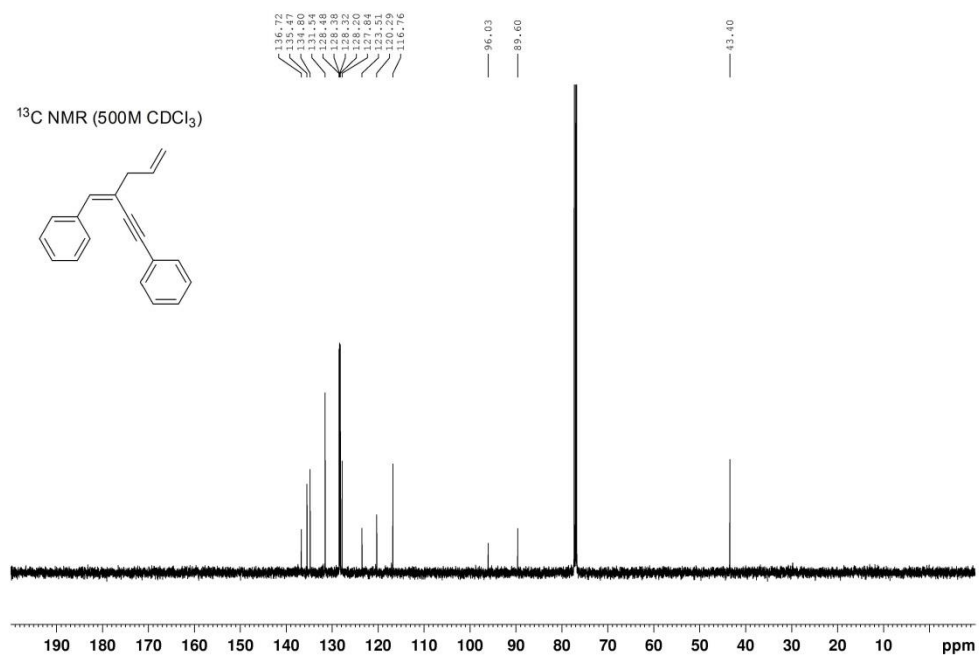

**(Z)-4,4'-(2-allylbut-1-en-3-yne-1,4-diyl)bis(ethylbenzene) (2i)**

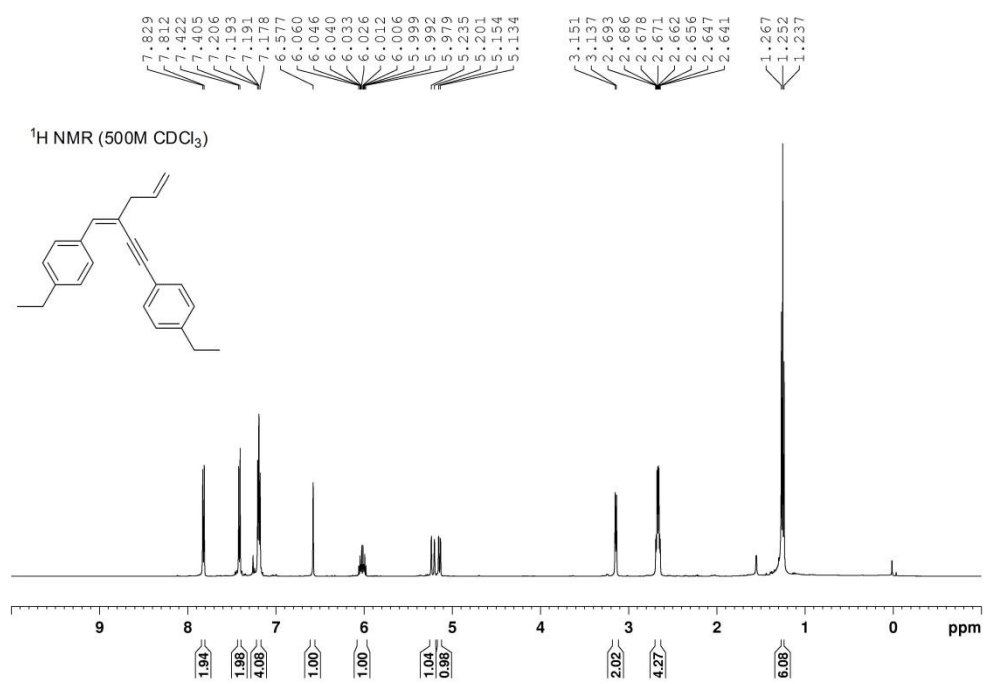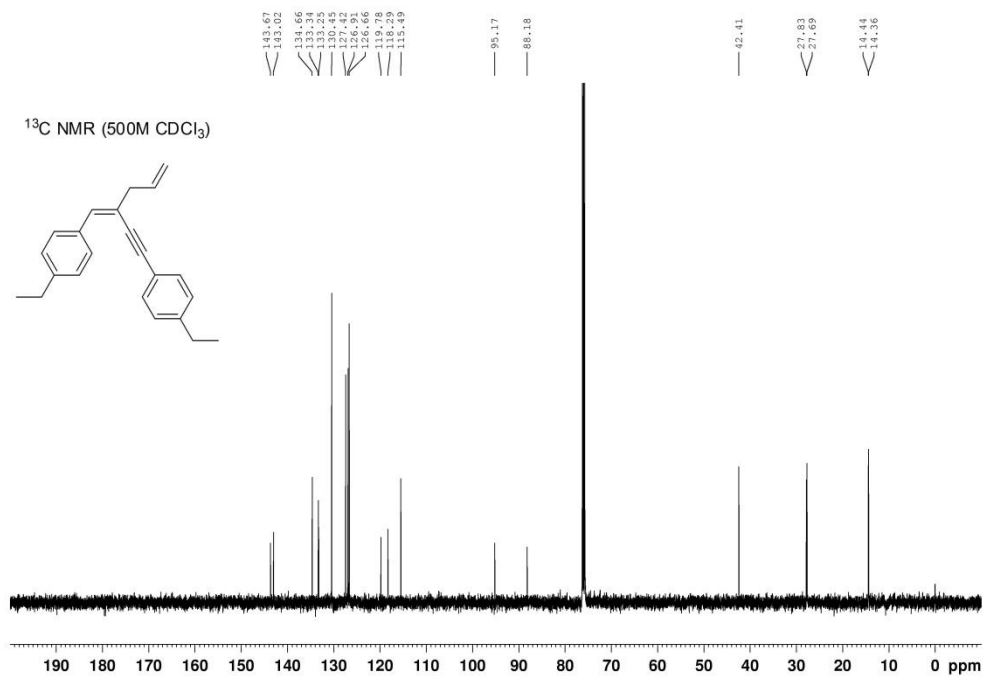

**(Z)-4,4'-(2-allylbut-1-en-3-yne-1,4-diyl)bis(tert-butylbenzene) (2j)**

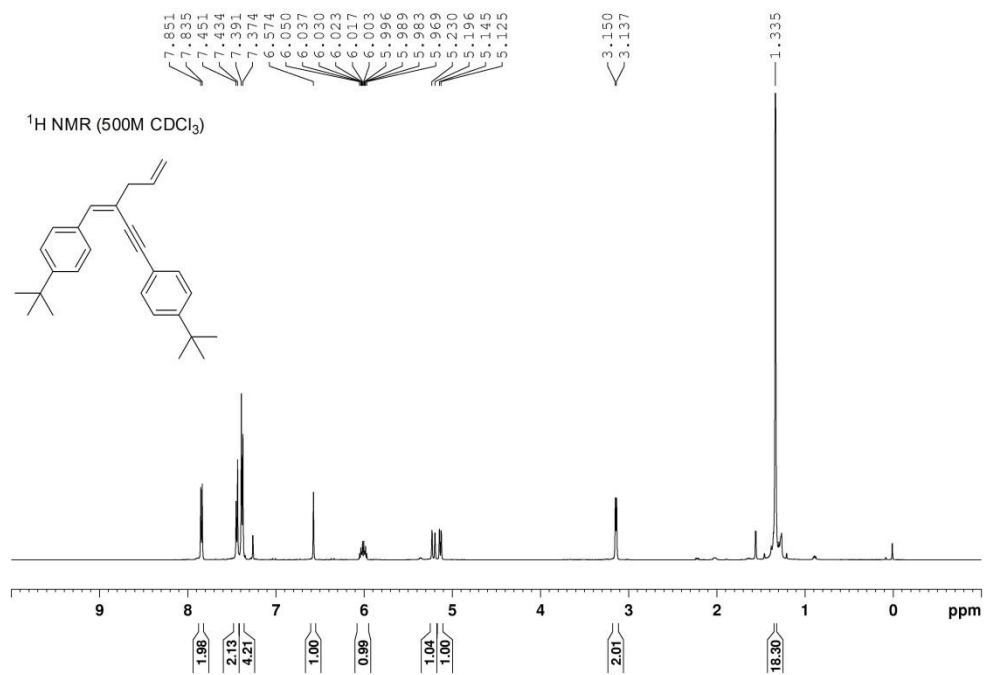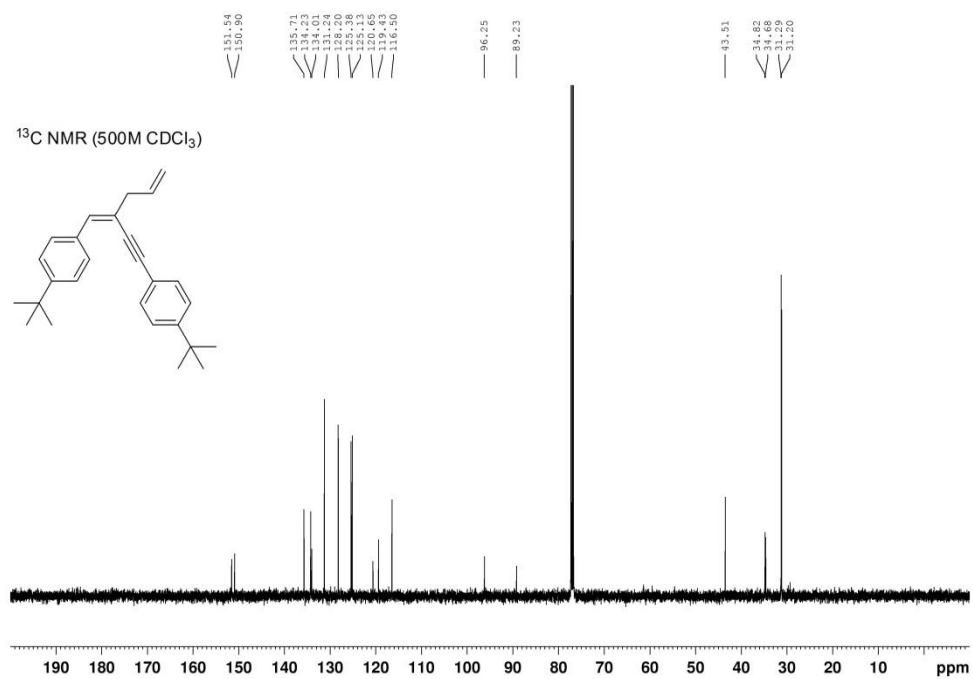

dimethyl 4,4'-(2-allylbut-1-en-3-yne-1,4-diyl)(Z)-dibenzoate (2k)

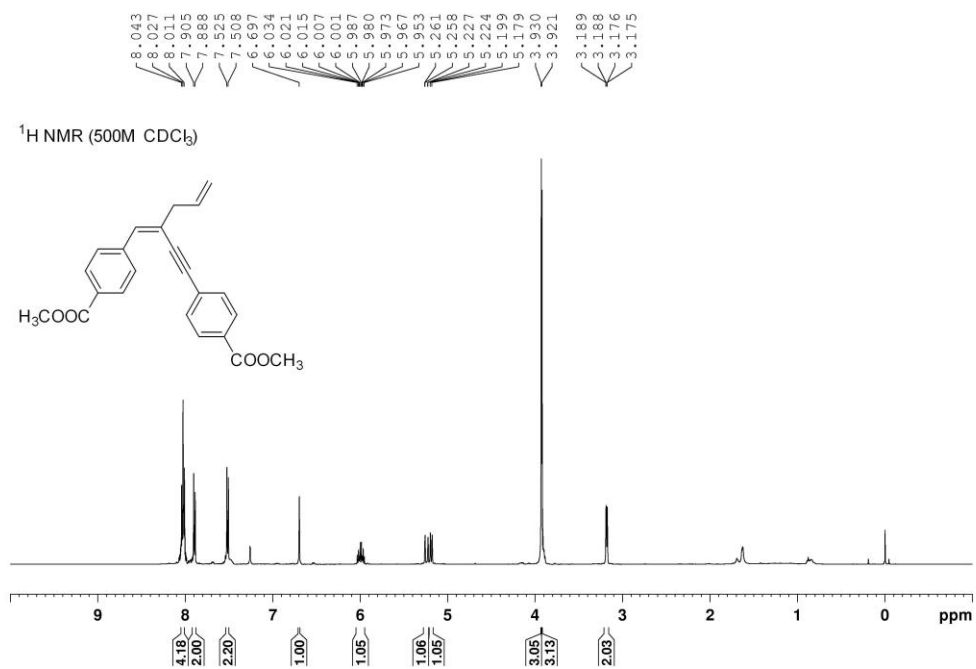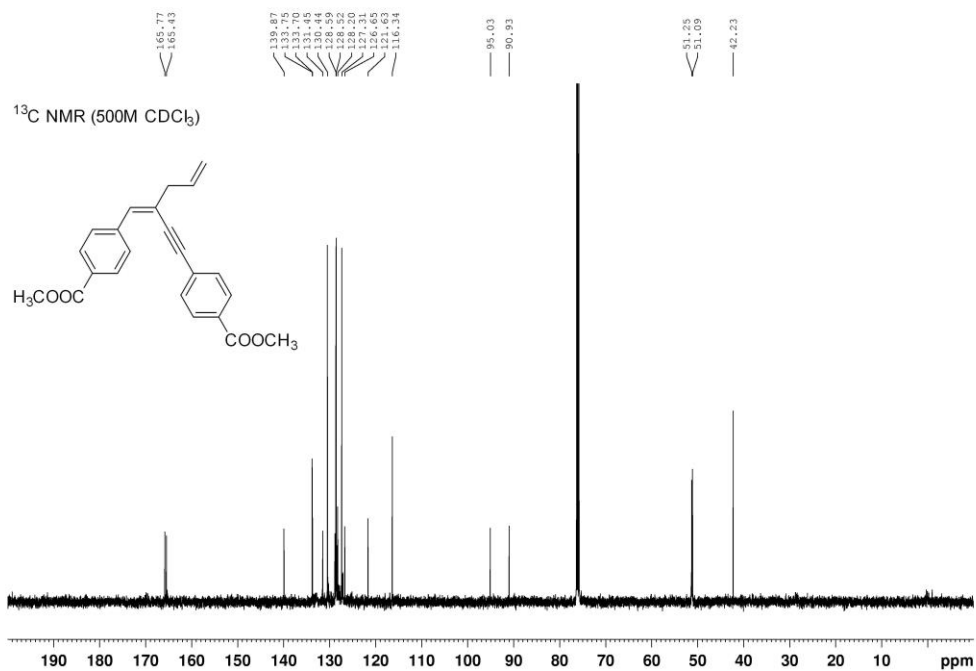

**(Z)-3,3'-(2-allylbut-1-en-3-yne-1,4-diyl)dithiophene (2l)**

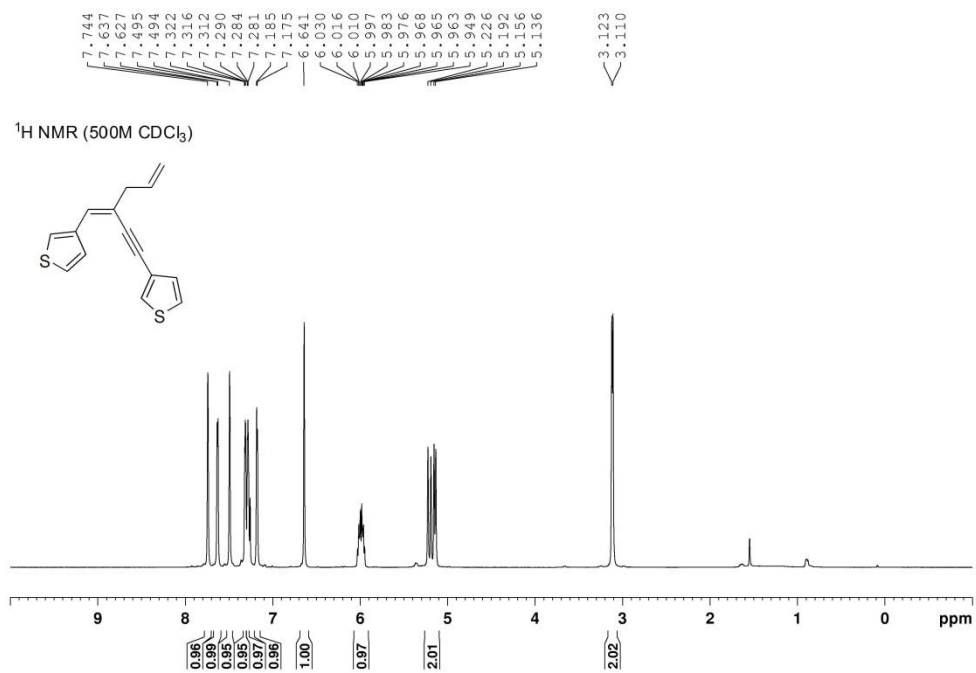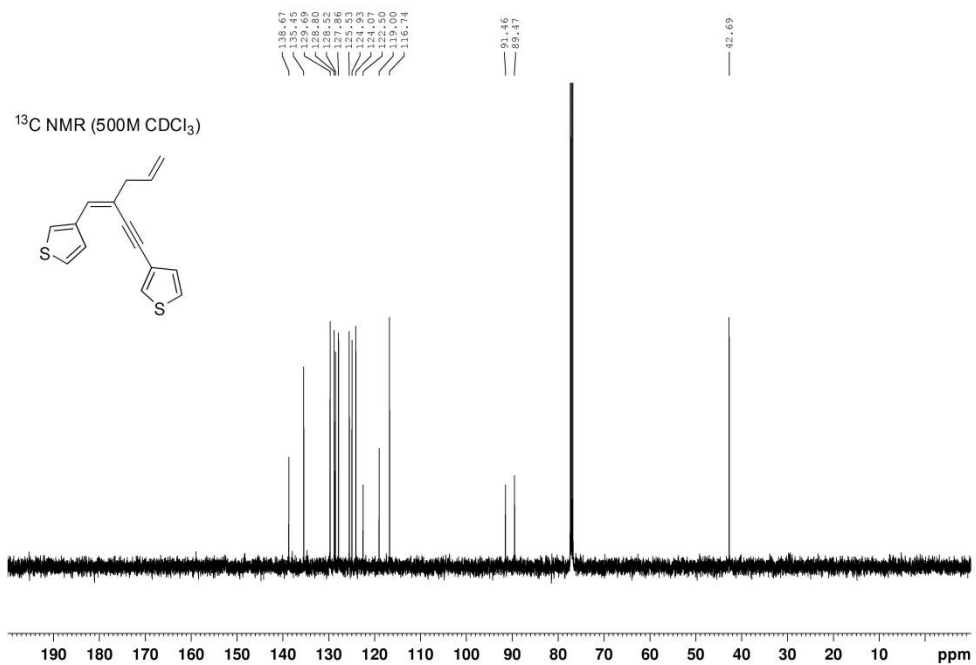

**(Z)-2,2'-(2-allylbut-1-en-3-yne-1,4-diyl)bis(fluorobenzene) (2m)**

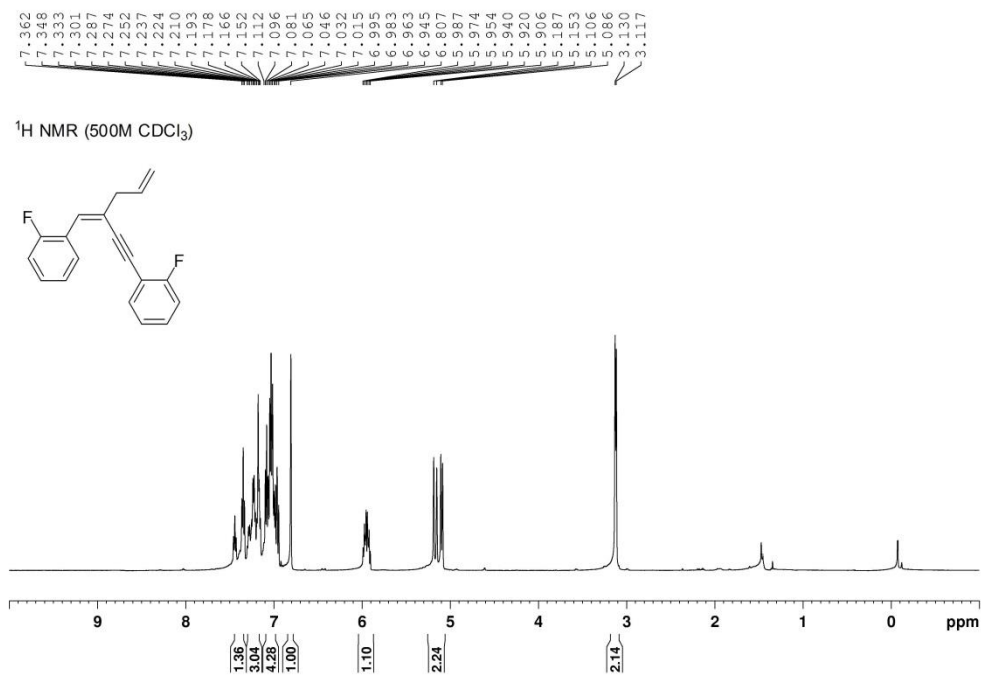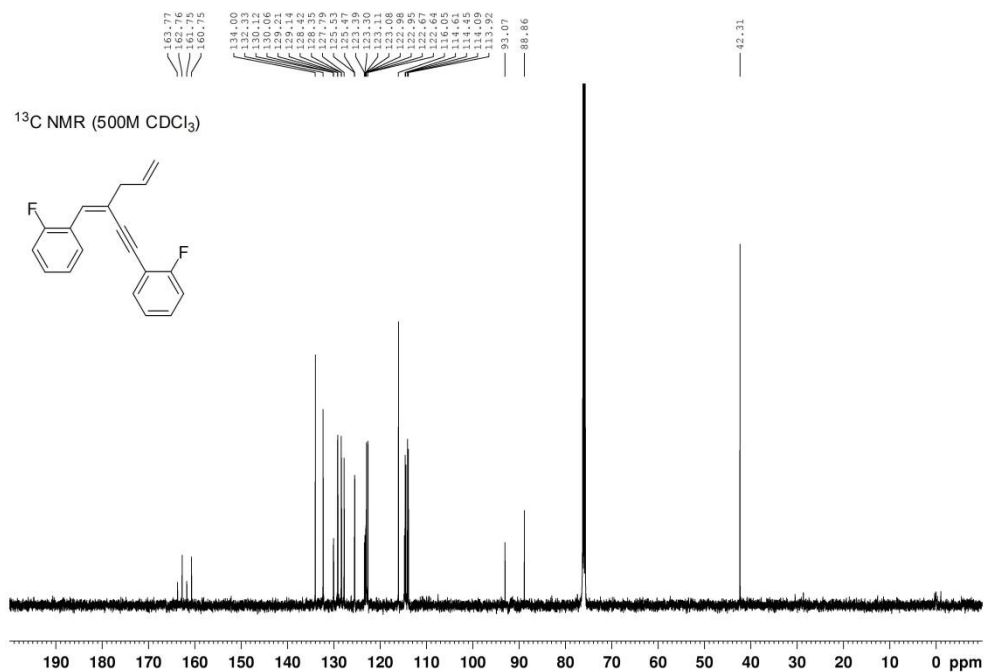



**(Z)-4,4'-(2-allylbut-1-en-3-yne-1,4-diyl)bis(fluorobenzene) (2n)**

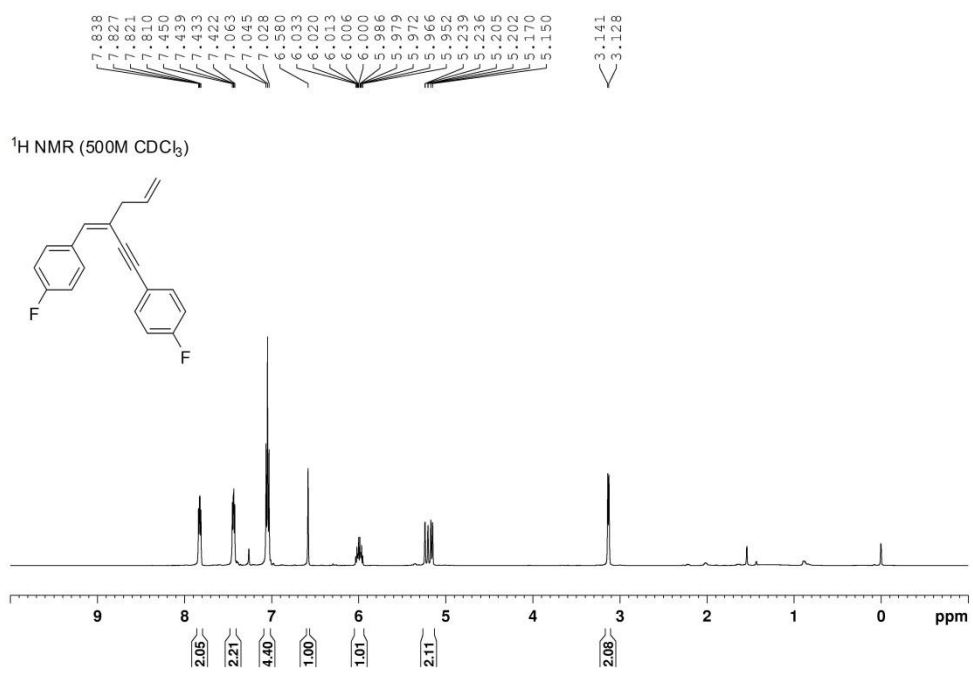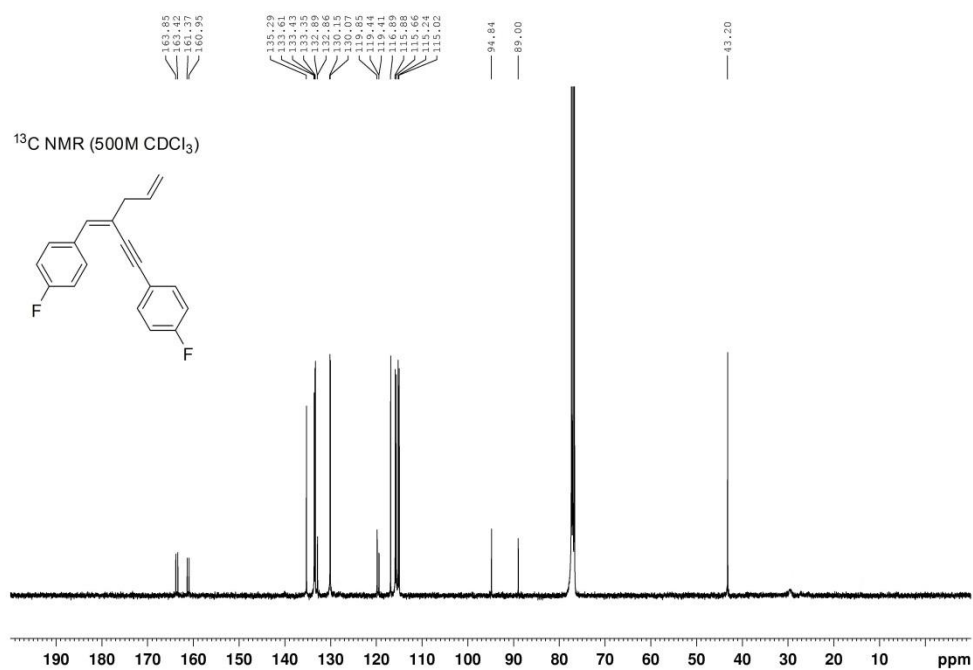

**(Z)-4-(2,2-dimethylpropylidene)-7,7-dimethyloct-1-en-5-yne (2o)**

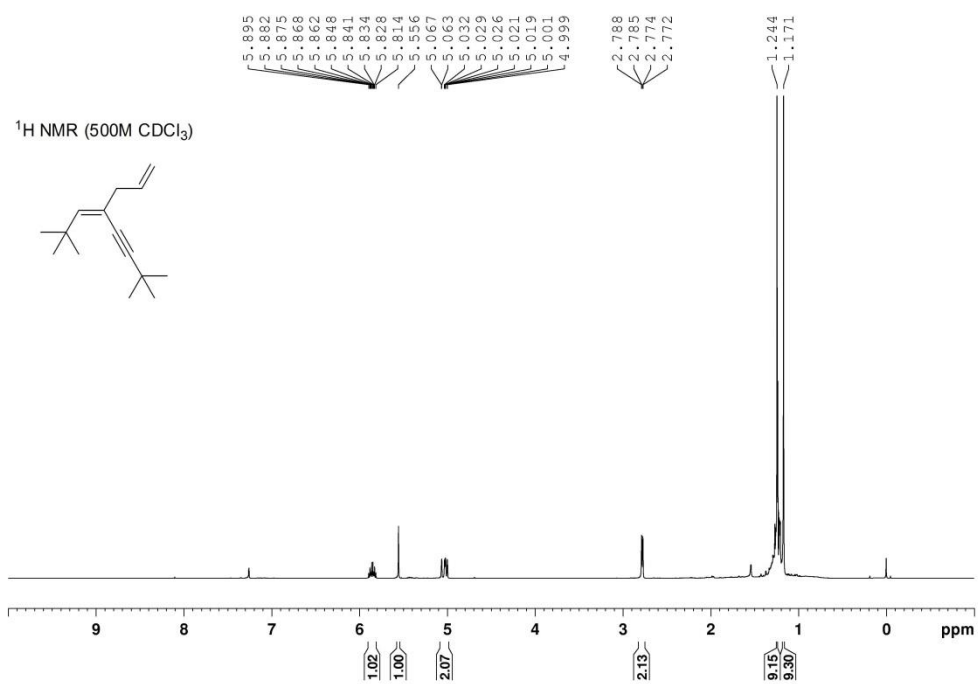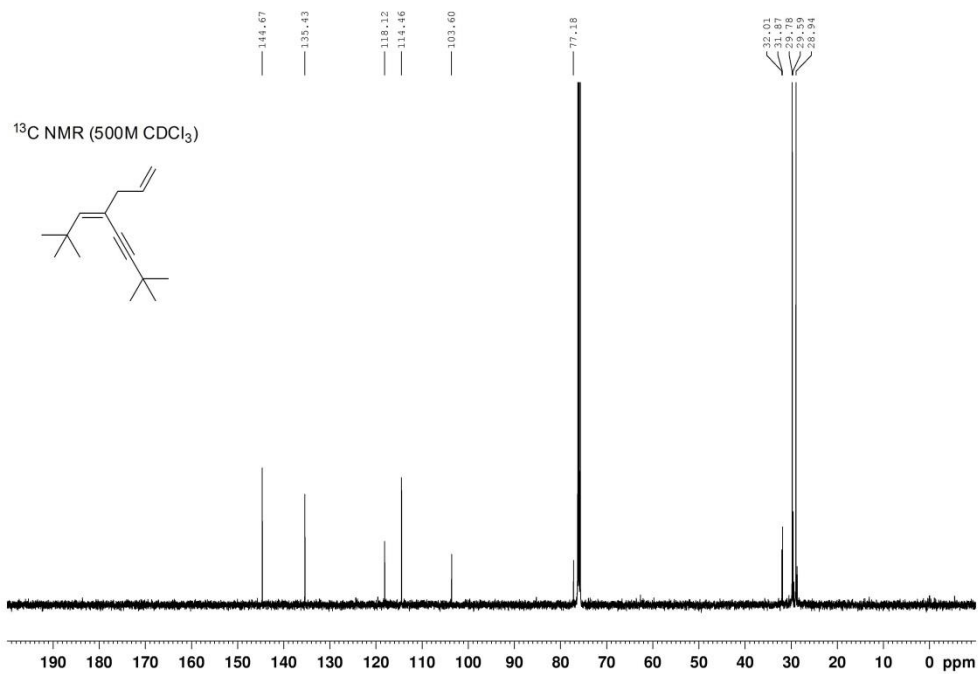

**(Z)-8-allylhexadec-7-en-9-yne (2p)**

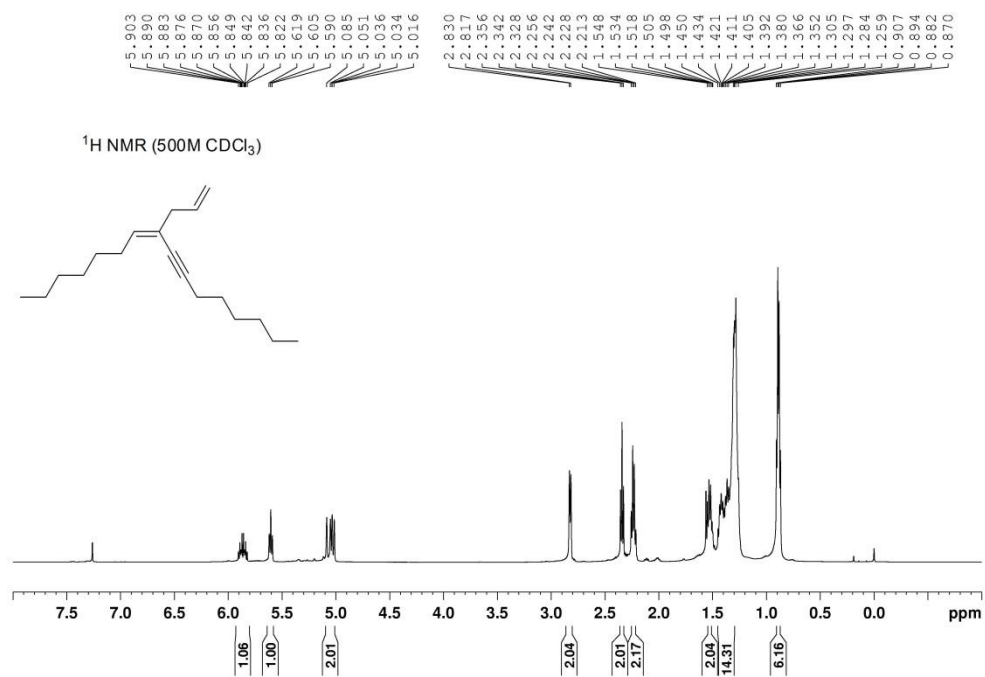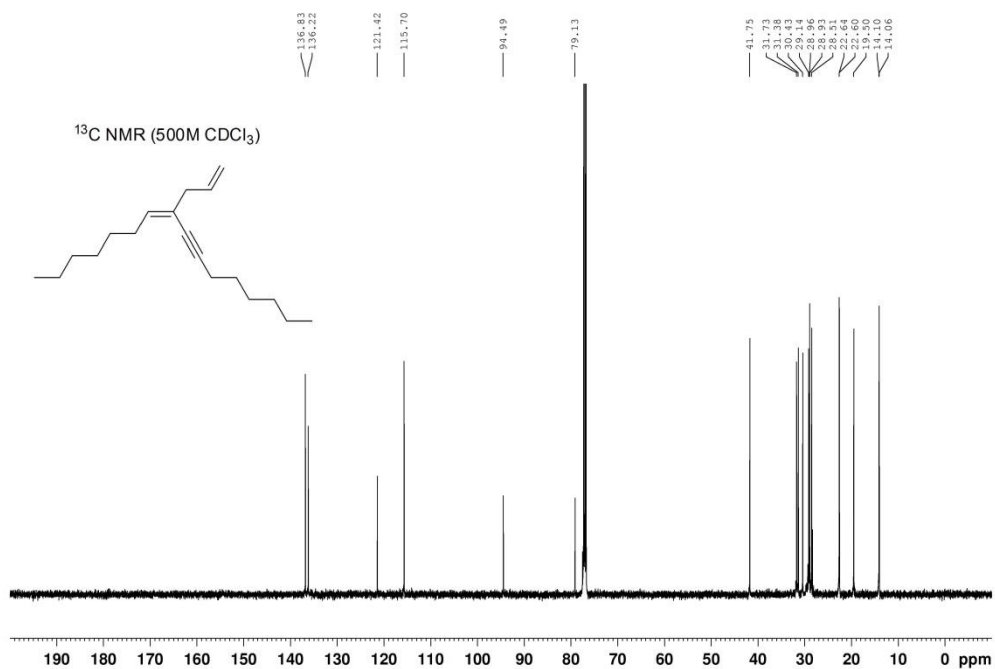

**(Z)-(2-allyl-5-methylhex-1-en-3-yn-1-yl)benzene (2s)**

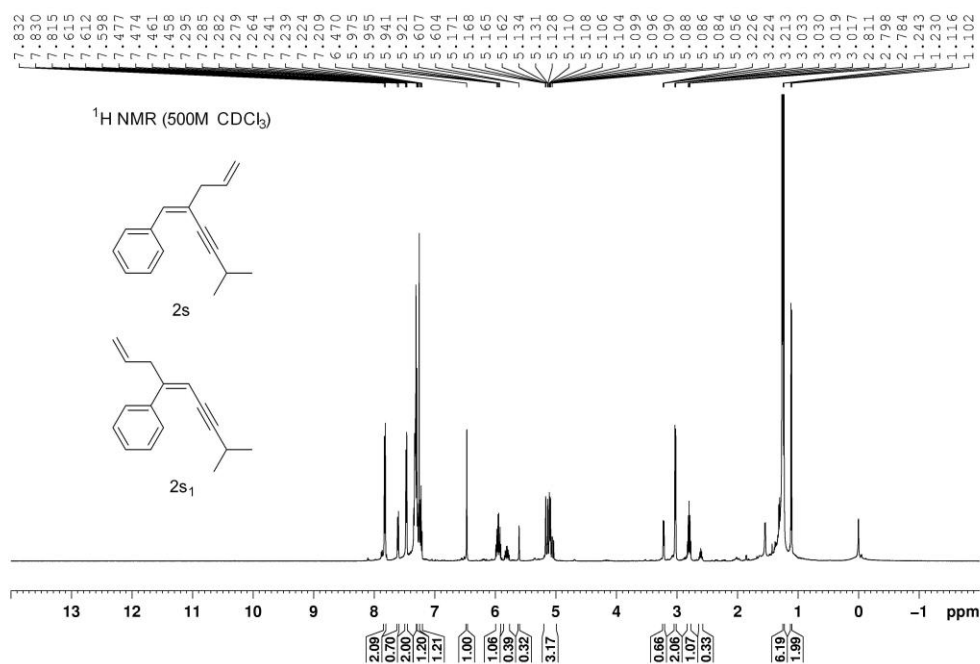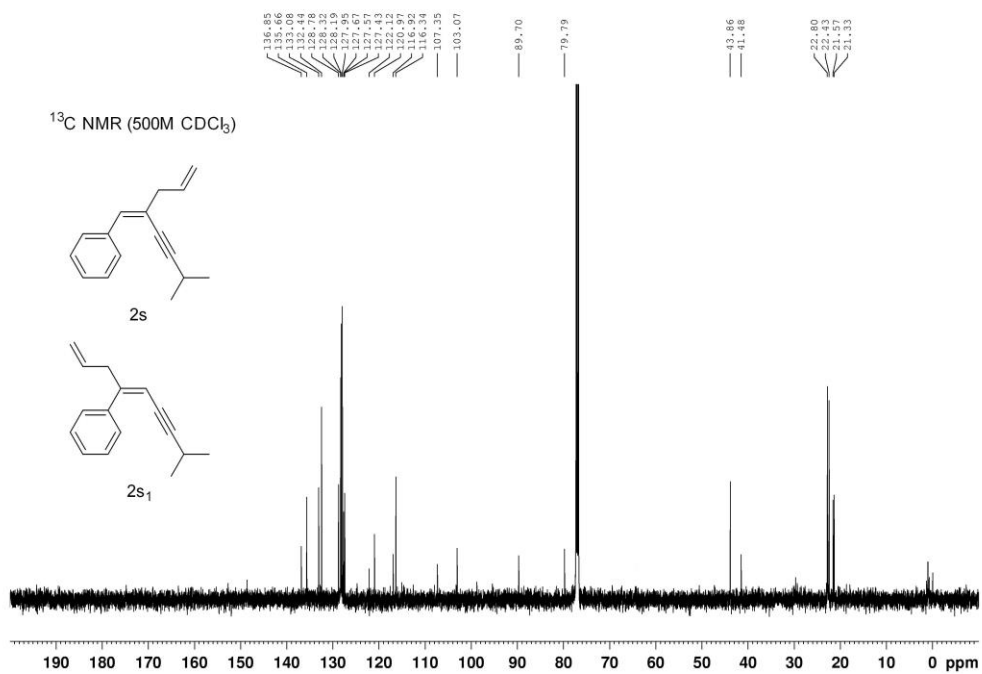

**(Z)-1-(2-allyl-5,5-dimethylhex-1-en-3-yn-1-yl)cyclohex-1-ene(2t)**

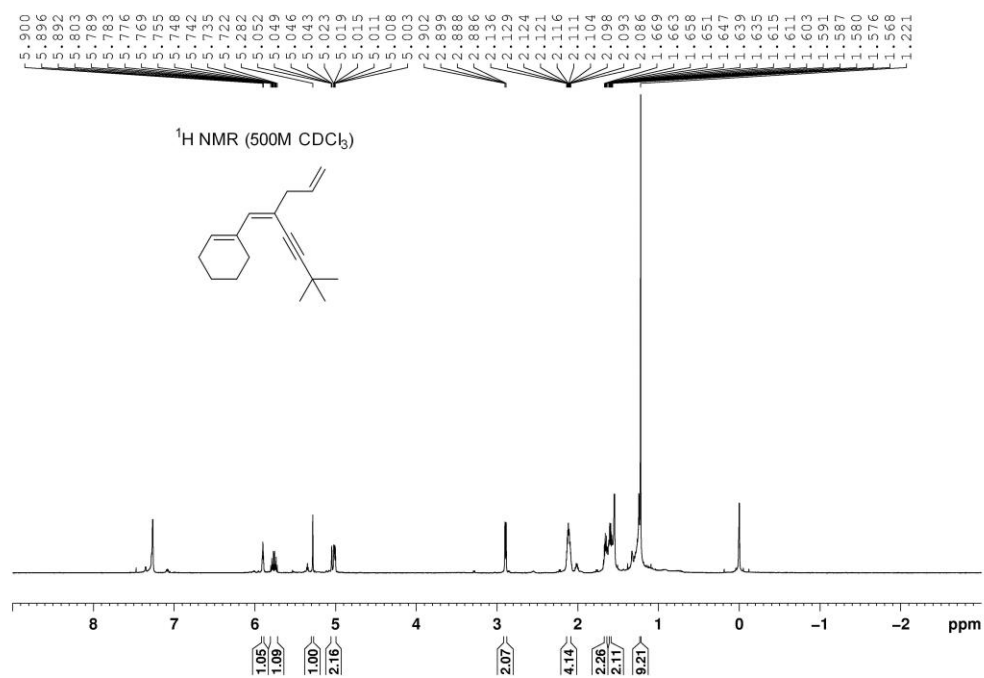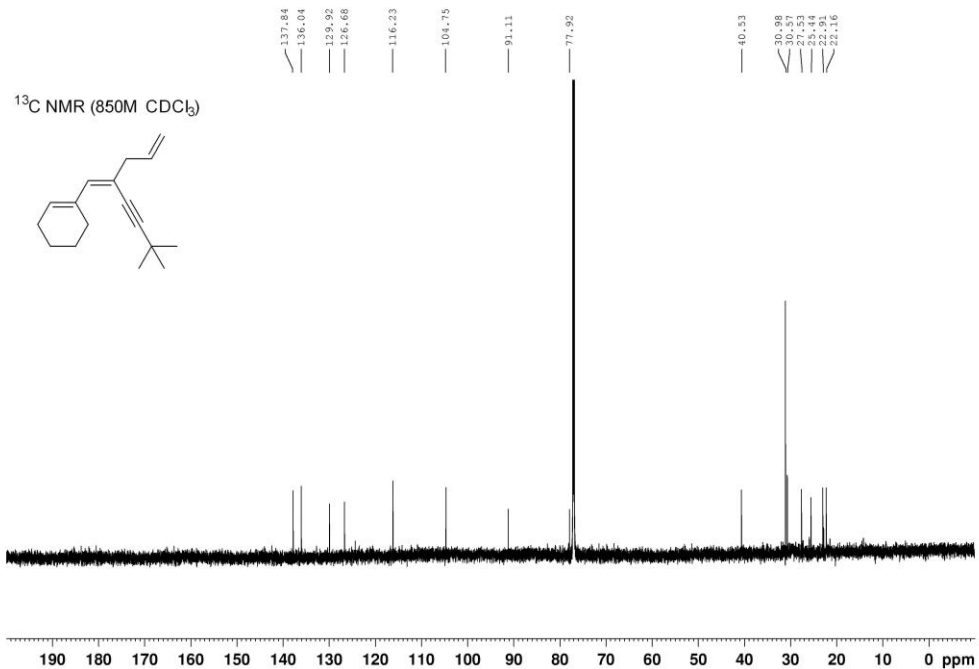

**(Z)-trimethyl(4-phenylhepta-3,6-dien-1-ynyl)silane (3a)**

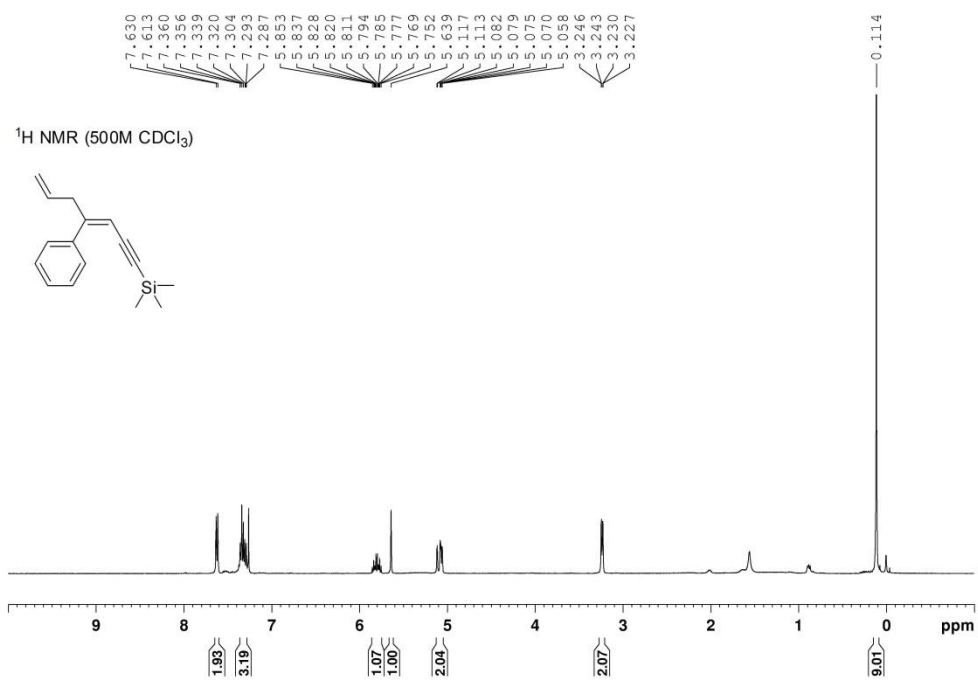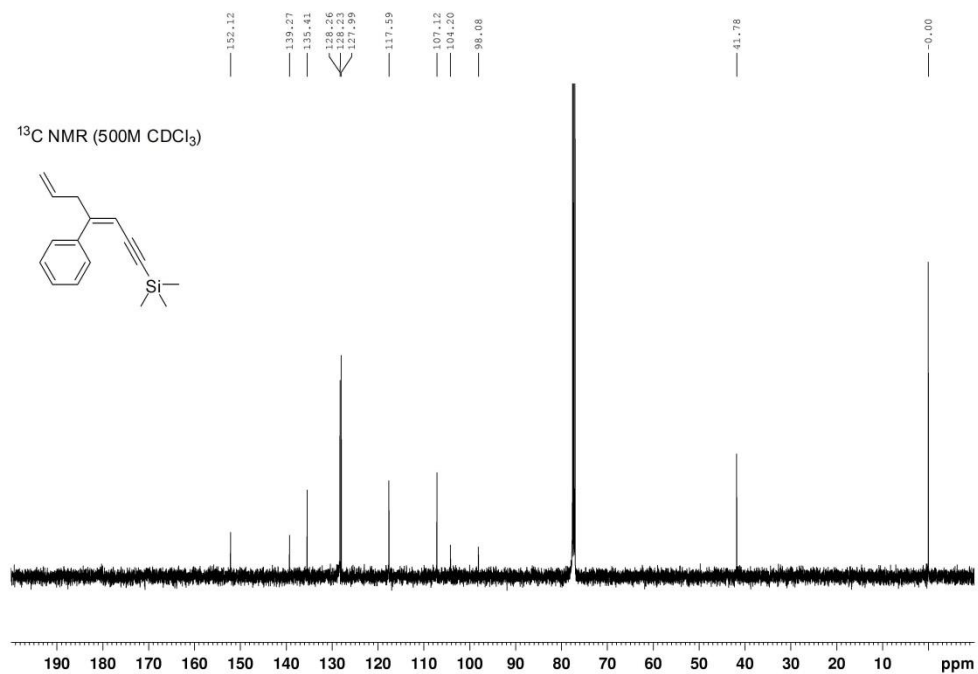

**(Z)-trimethyl(4-phenylhepta-3,6-dien-1-ynyl)silane (NOE of 3a)**

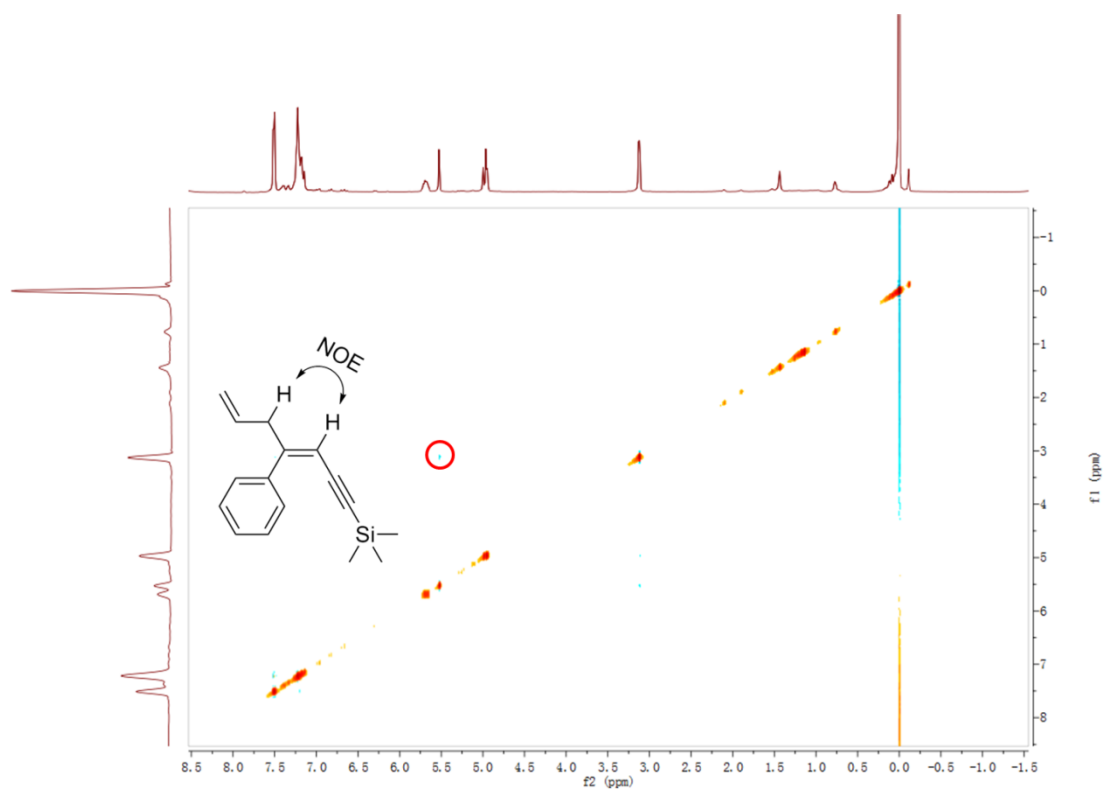

**(Z)-(4-(4-bromophenyl)hepta-3,6-dien-1-ynyl)trimethylsilane (3b)**

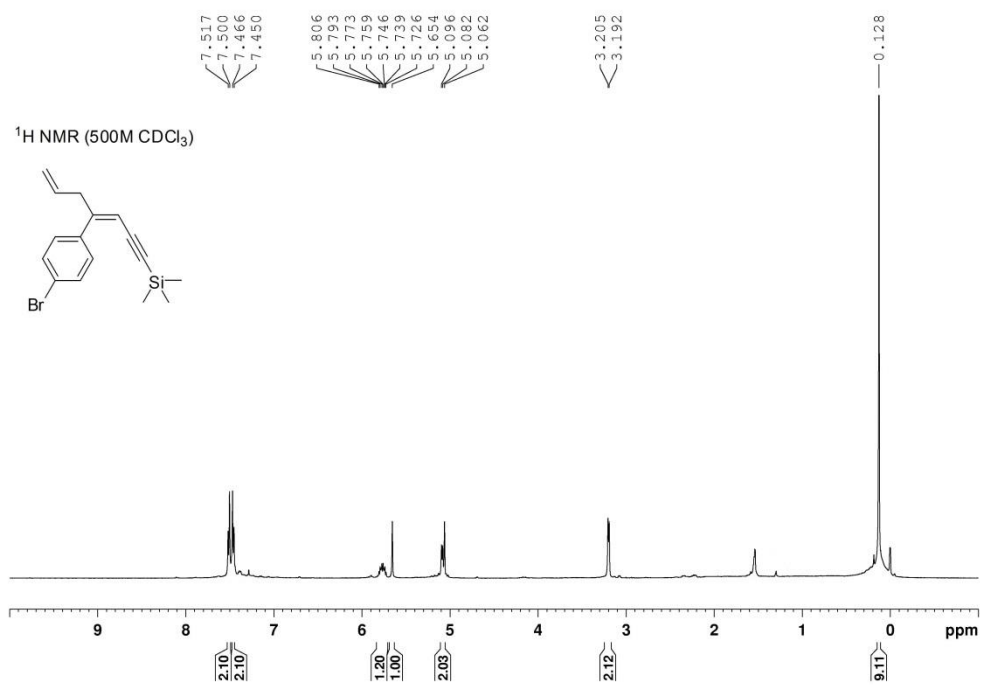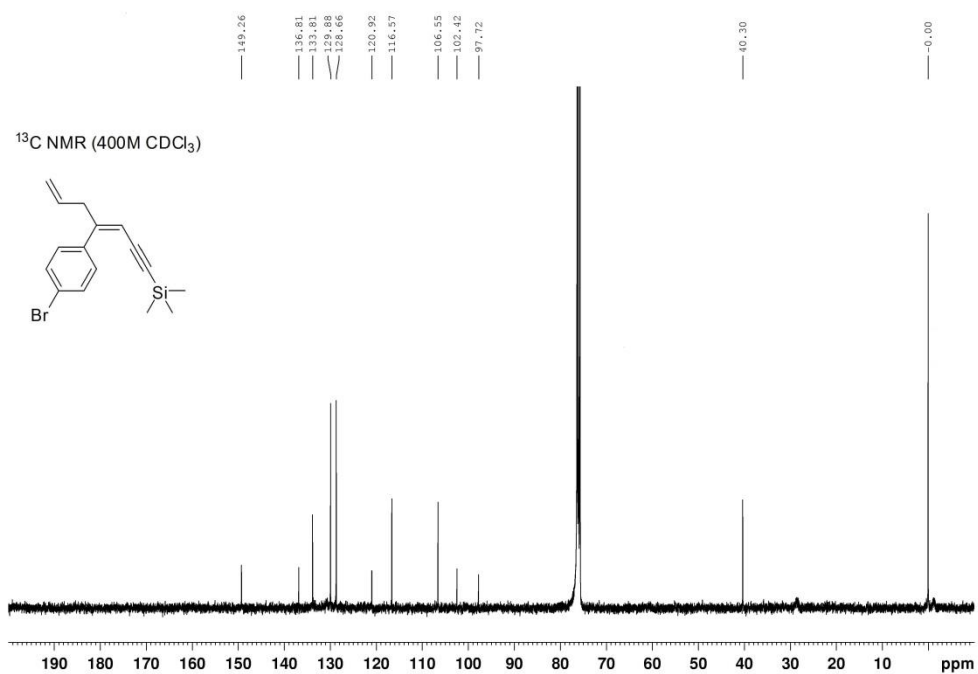



**(Z)-(4-(4-chlorophenyl)hepta-3,6-dien-1-ynyl)trimethylsilane (3c)**

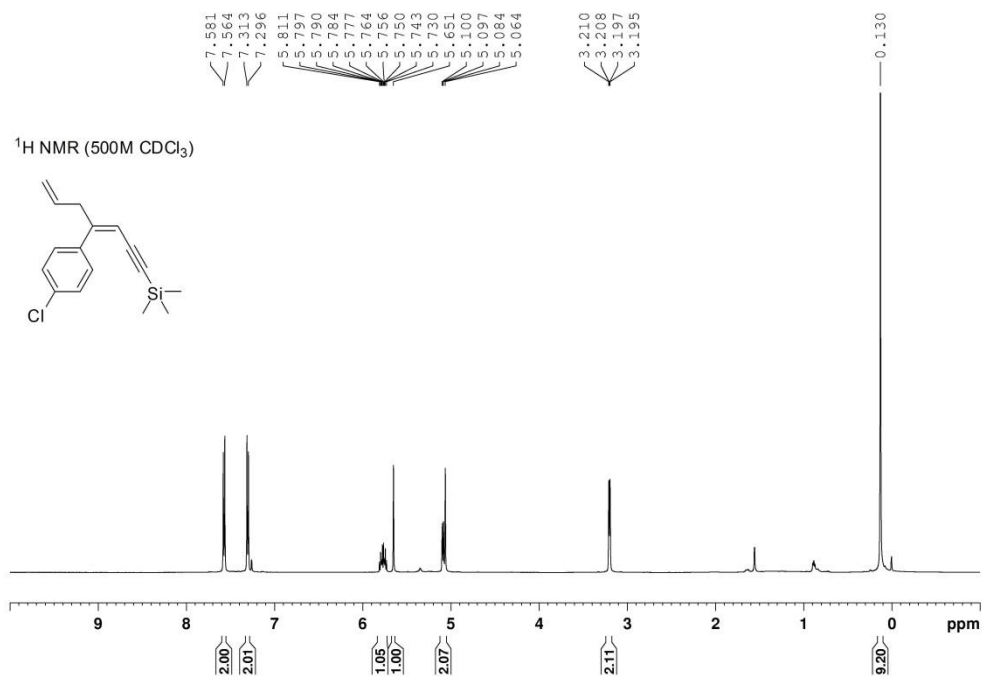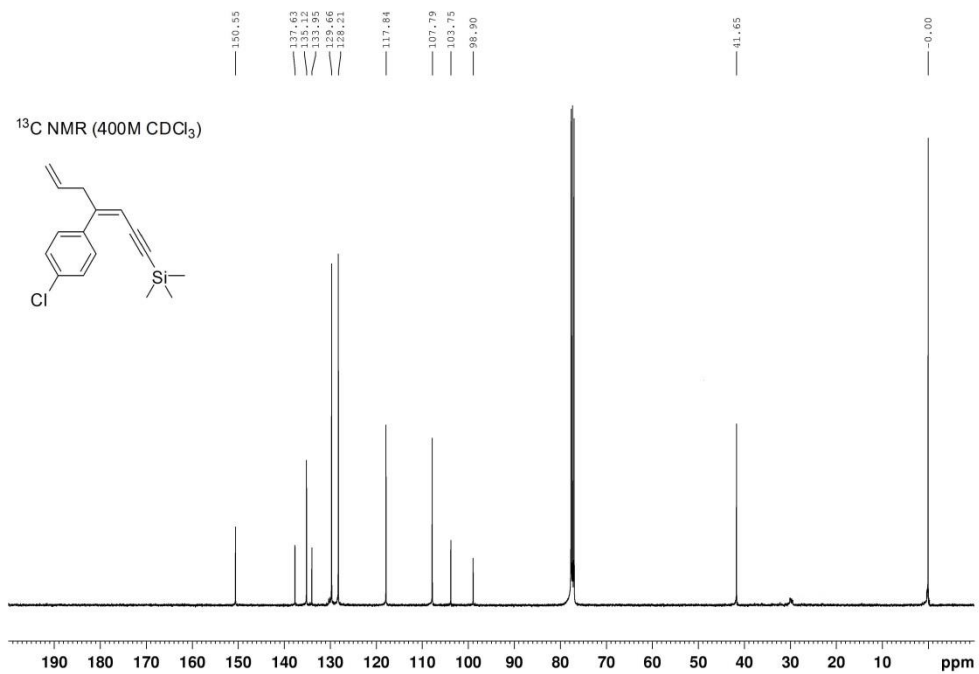

**(Z)-methyl 4-(1-(trimethylsilyl)hepta-3,6-dien-1-yn-4-yl)benzoate (3d)**

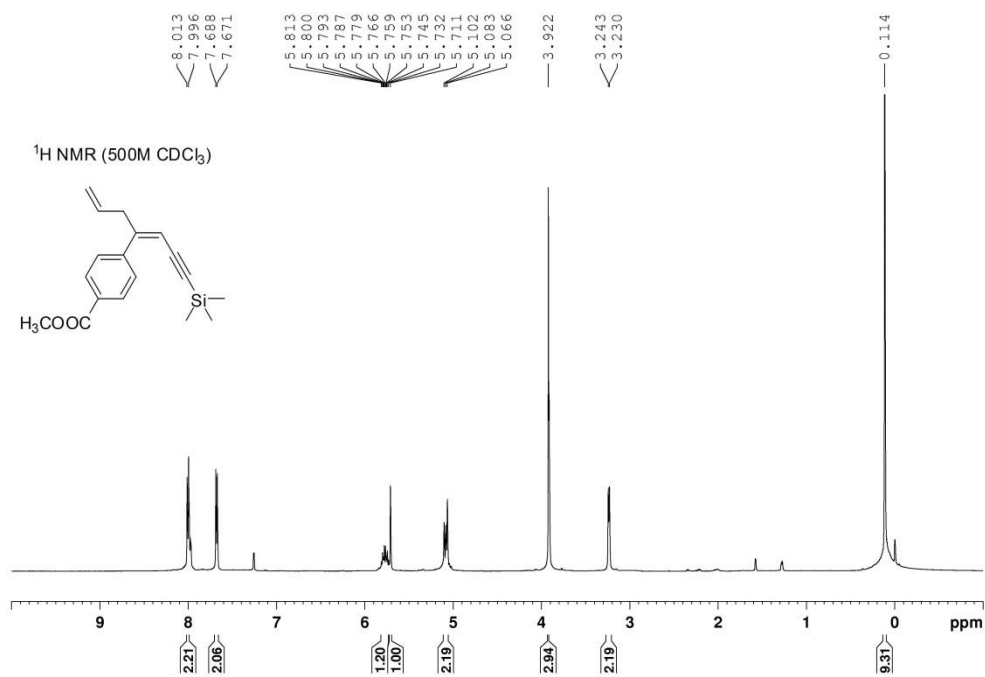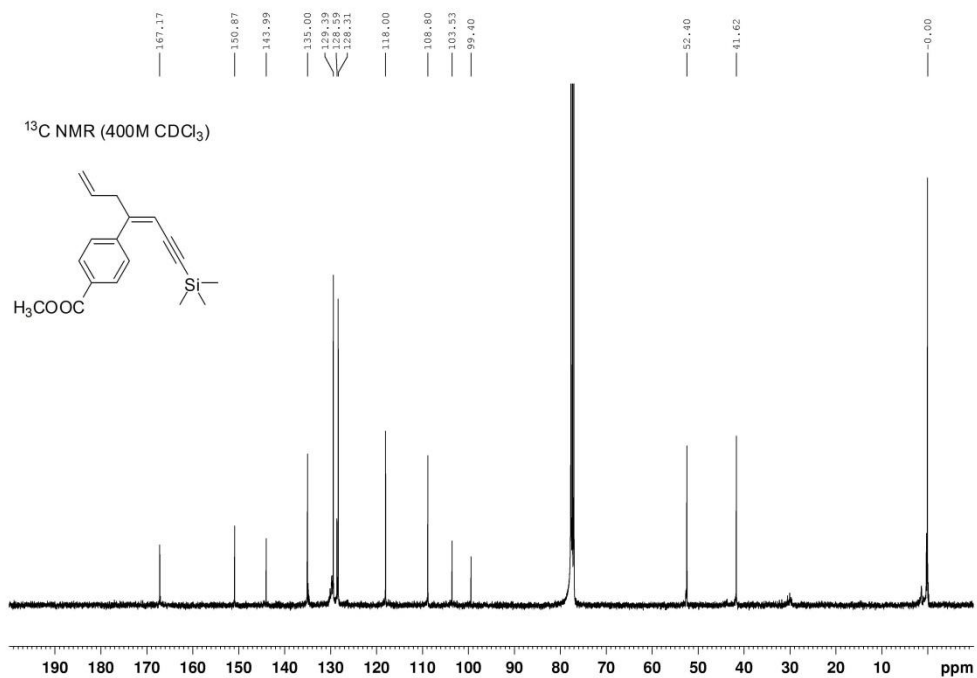

**(Z)-(4-(4-methoxyphenyl)hepta-3,6-dien-1-ynyl)trimethylsilane (3e)**

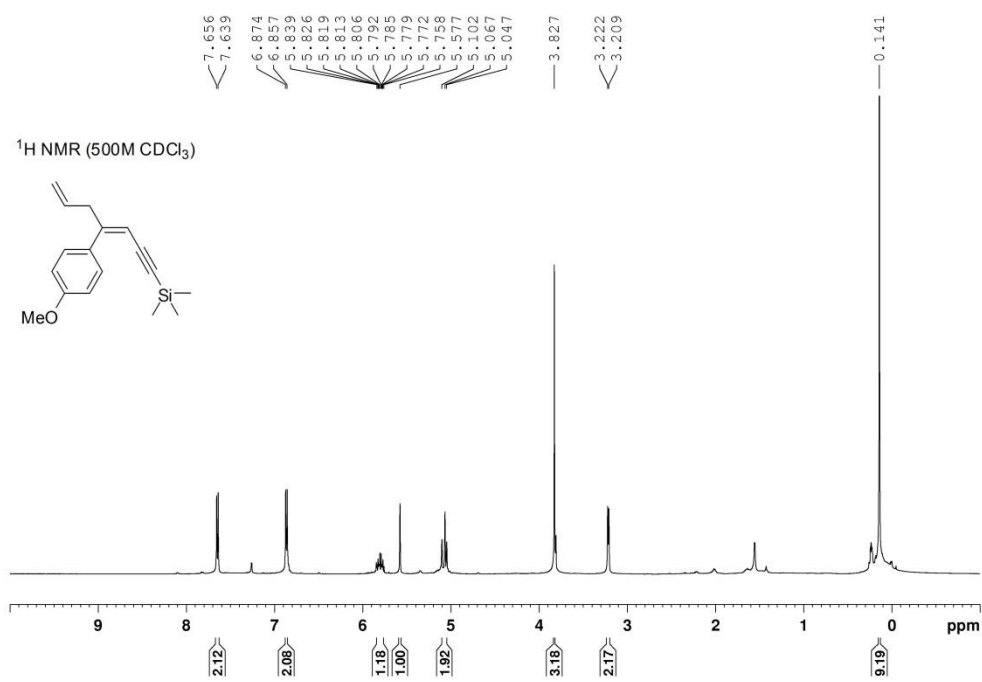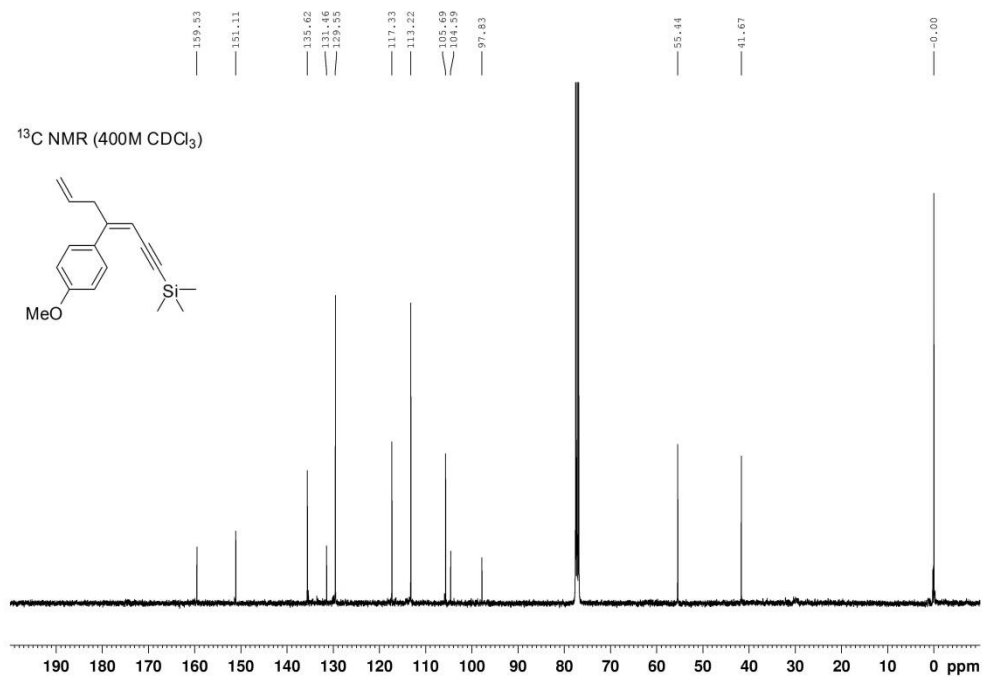

**(Z)-(4-(biphenyl-4-yl)hepta-3,6-dien-1-ynyl)trimethylsilane (3f)**

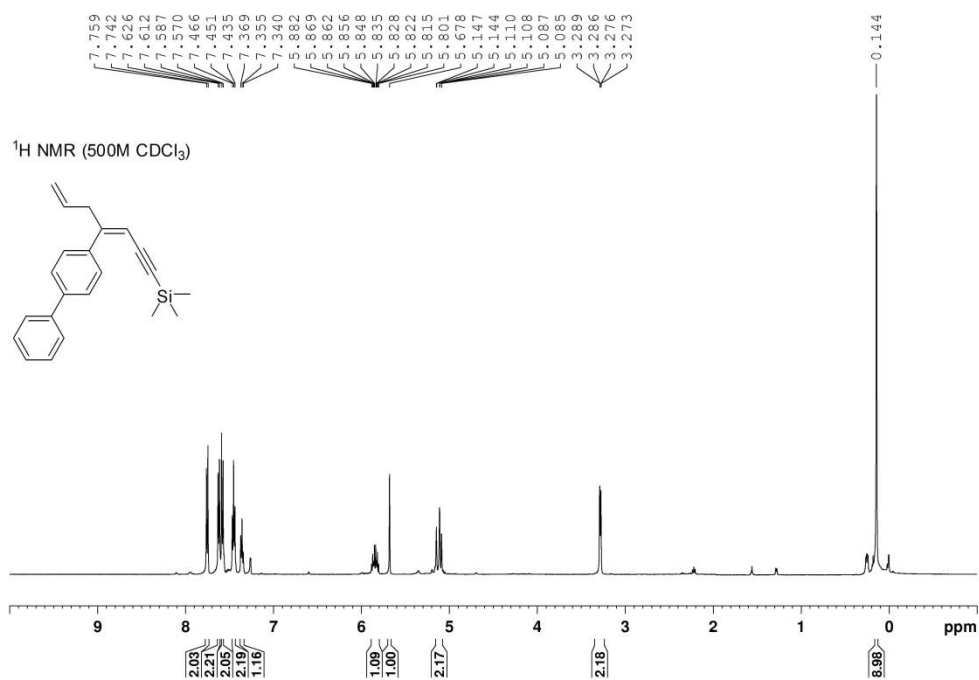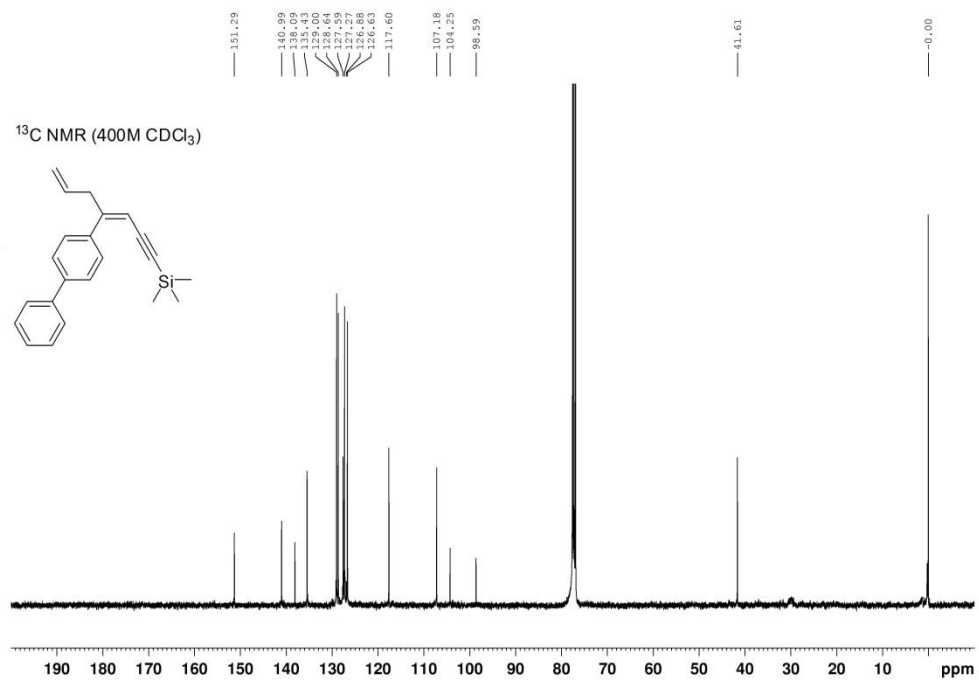

**(Z)-trimethyl(4-(thiophen-3-yl)hepta-3,6-dien-1-ynyl)silane (3g)**

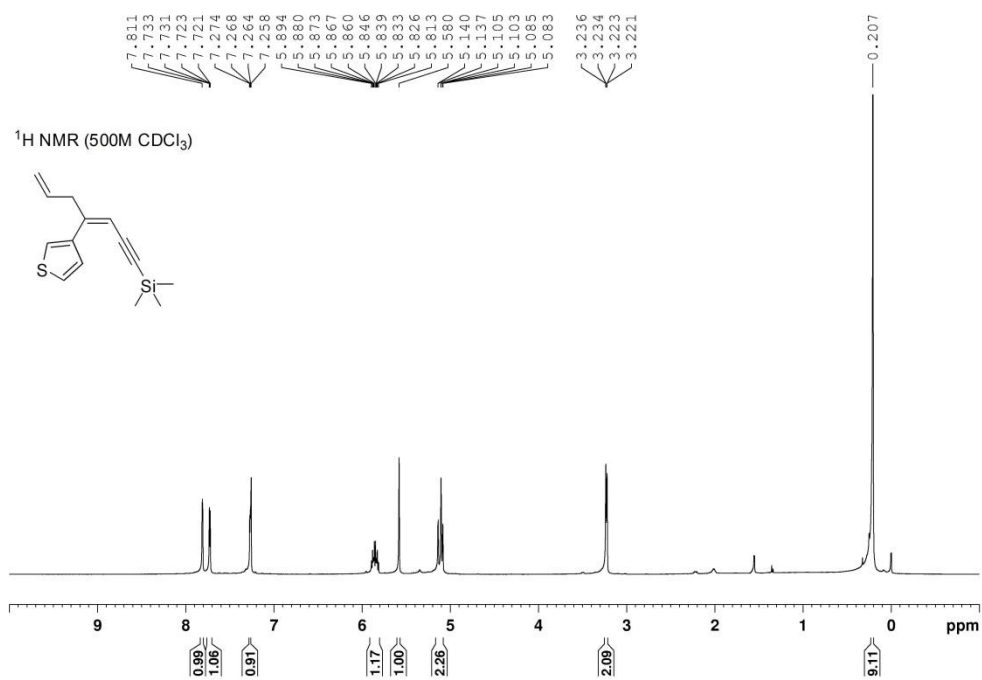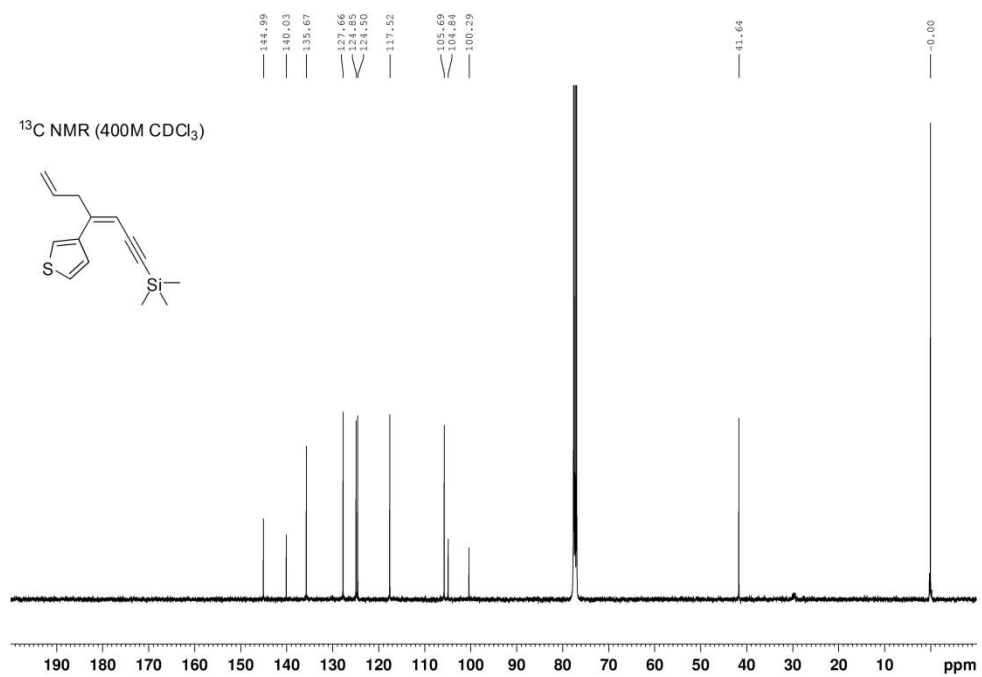

**(Z)-triisopropyl(4-phenylhepta-3,6-dien-1-ynyl)silane (3h)**

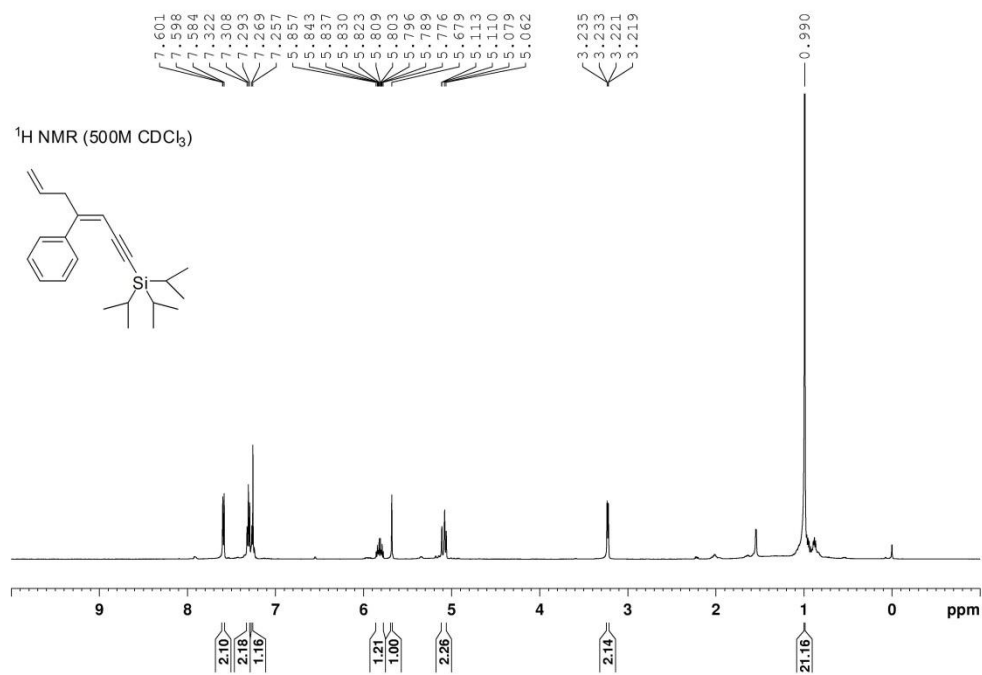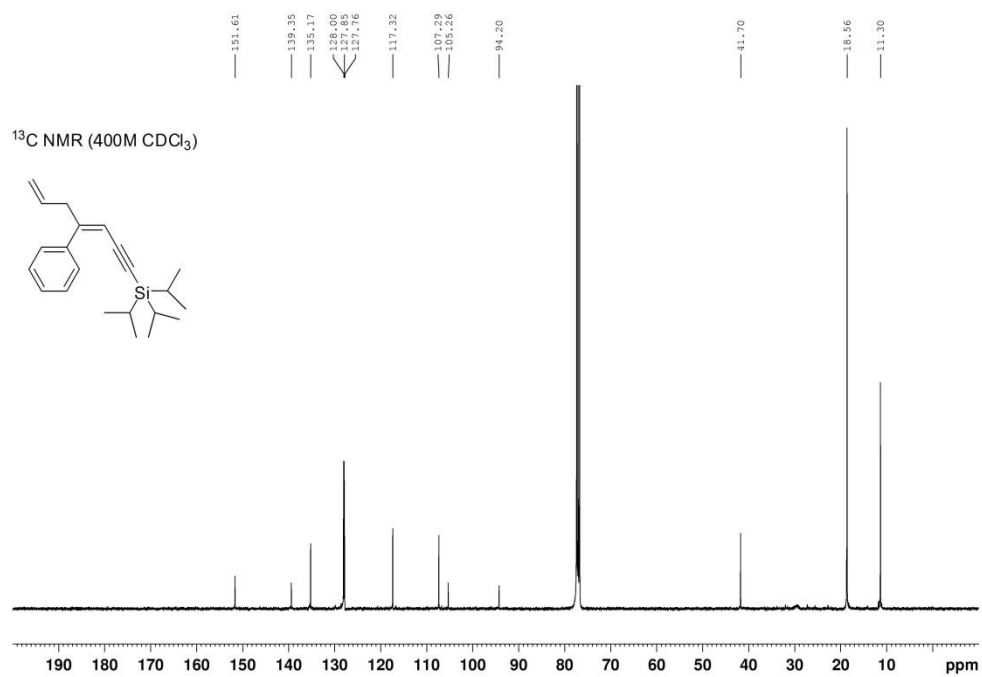

**(Z)-undeca-1,4-dien-6-yn-4-ylbenzene (3i)**

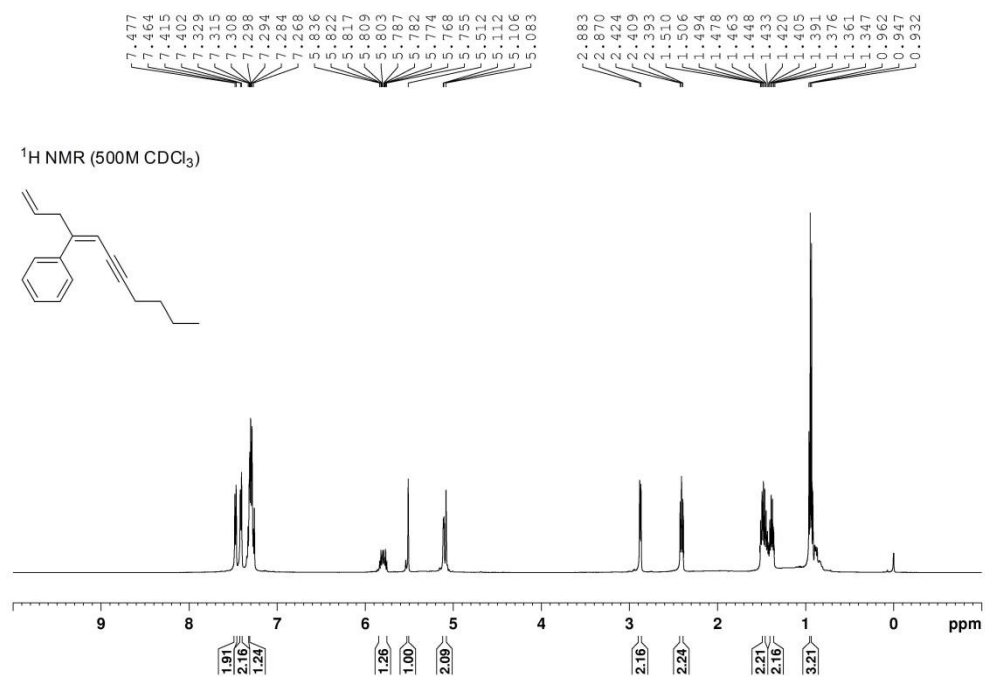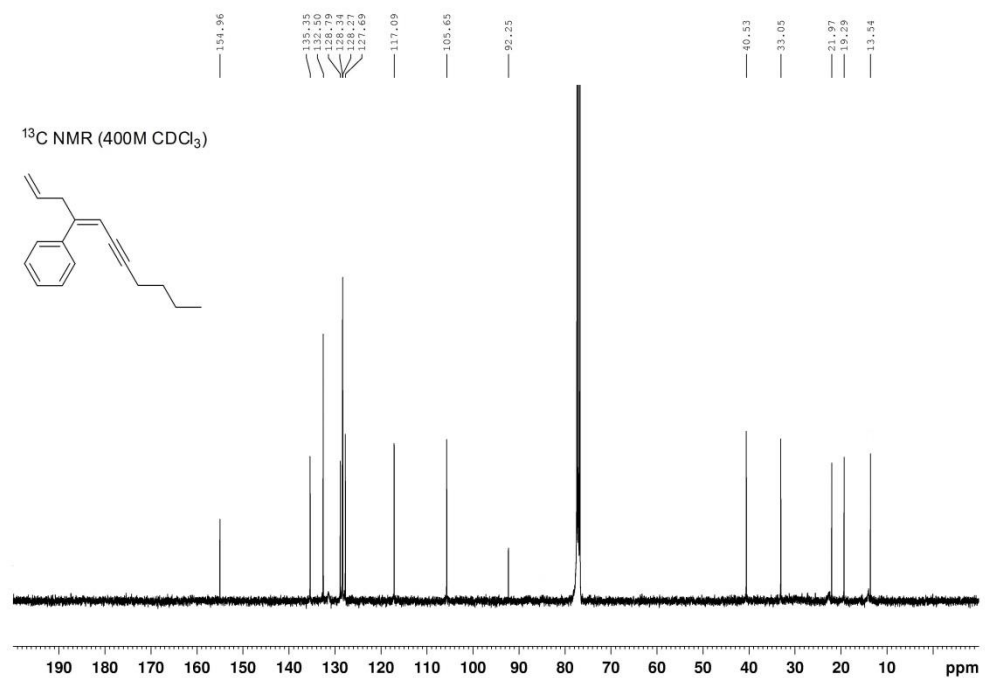

**(Z)-(8,8-dimethylnona-1,4-dien-6-yn-4-yl)benzene (3j)**

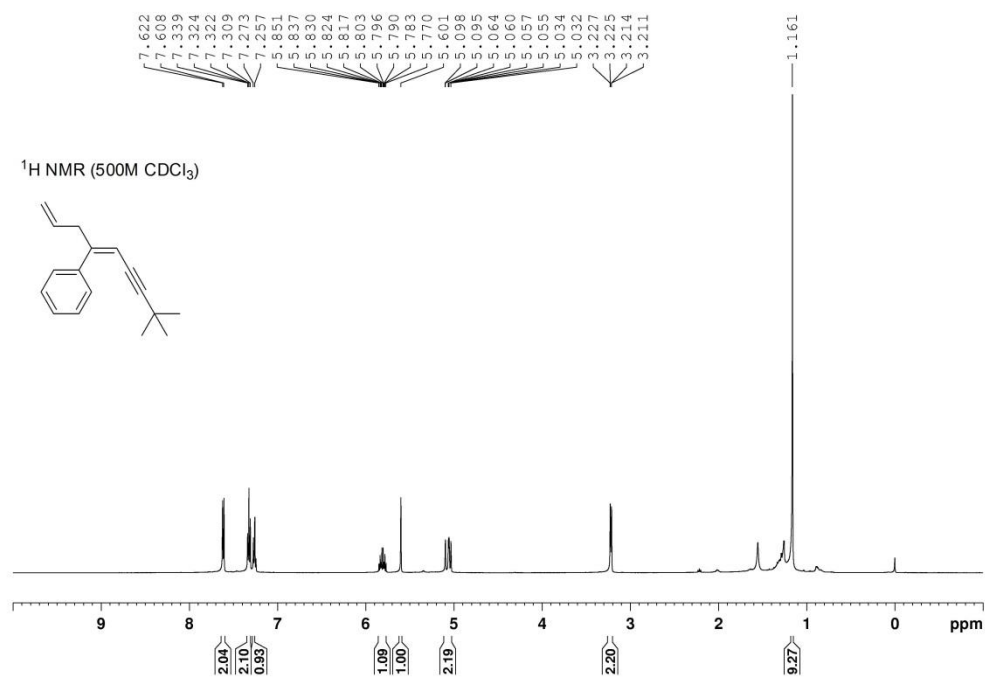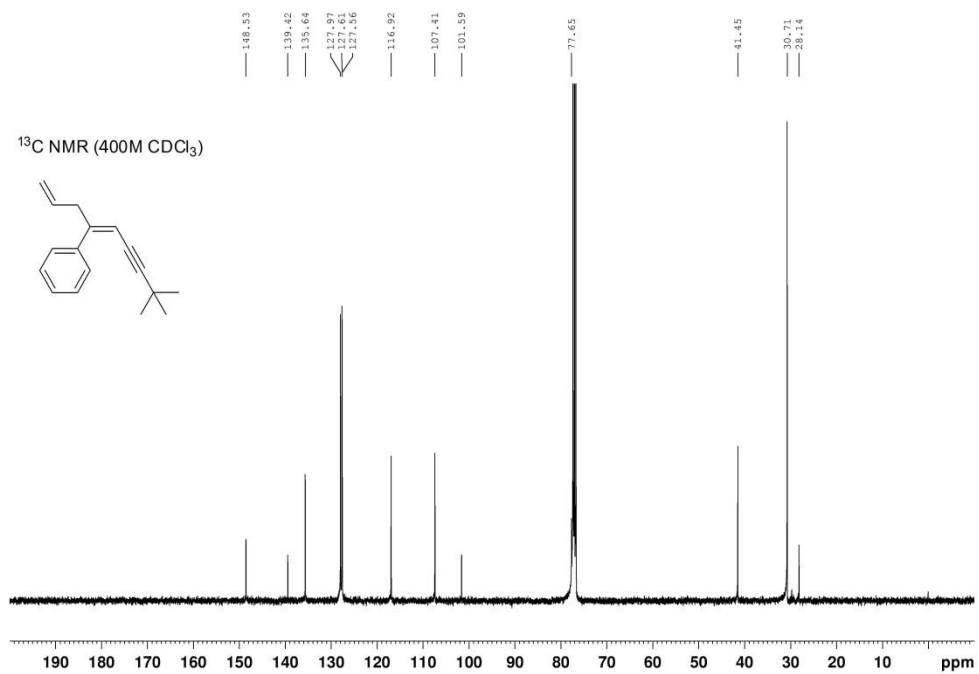



**(Z)-hepta-3,6-dien-1-yne-1,4-diylidibenzene (3k)**

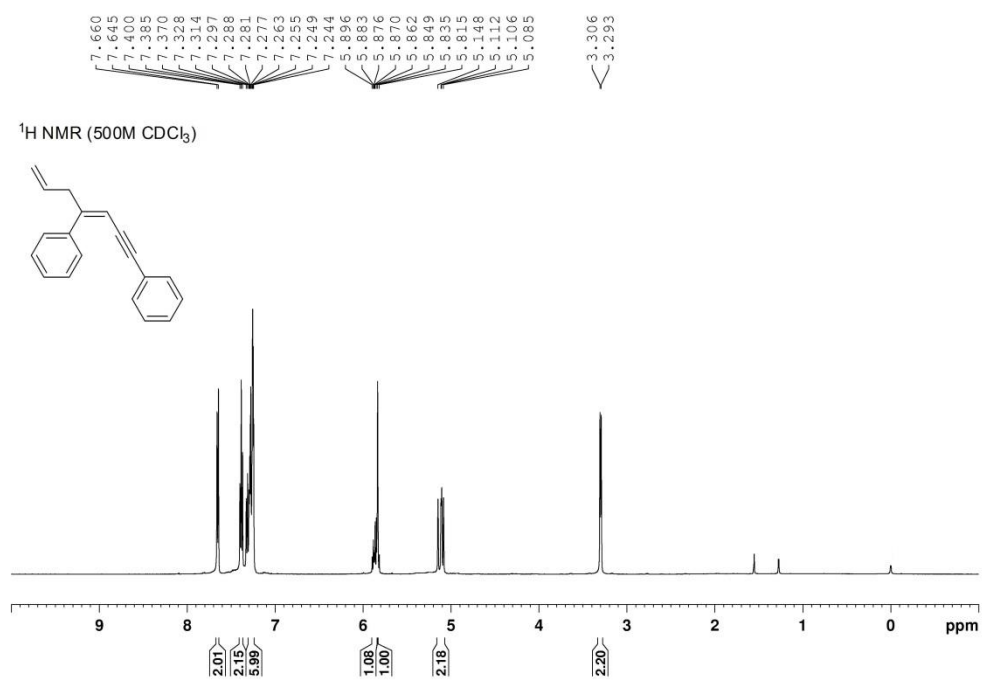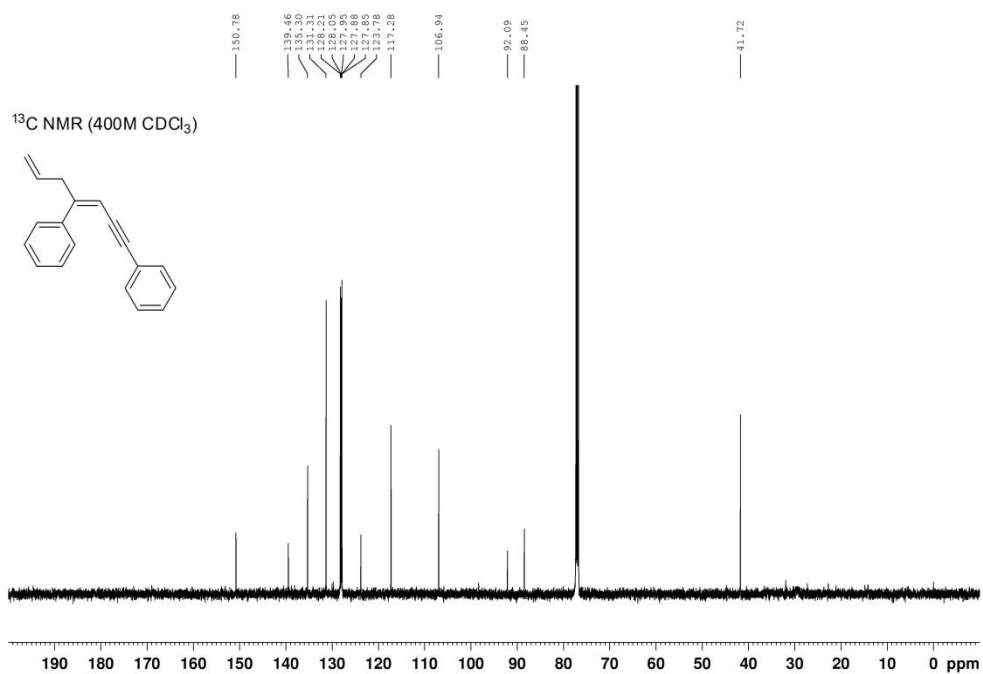

**(Z)-4,4'-(hepta-3,6-dien-1-yne-1,4-diyl)bis(tert-butylbenzene) (3l)**

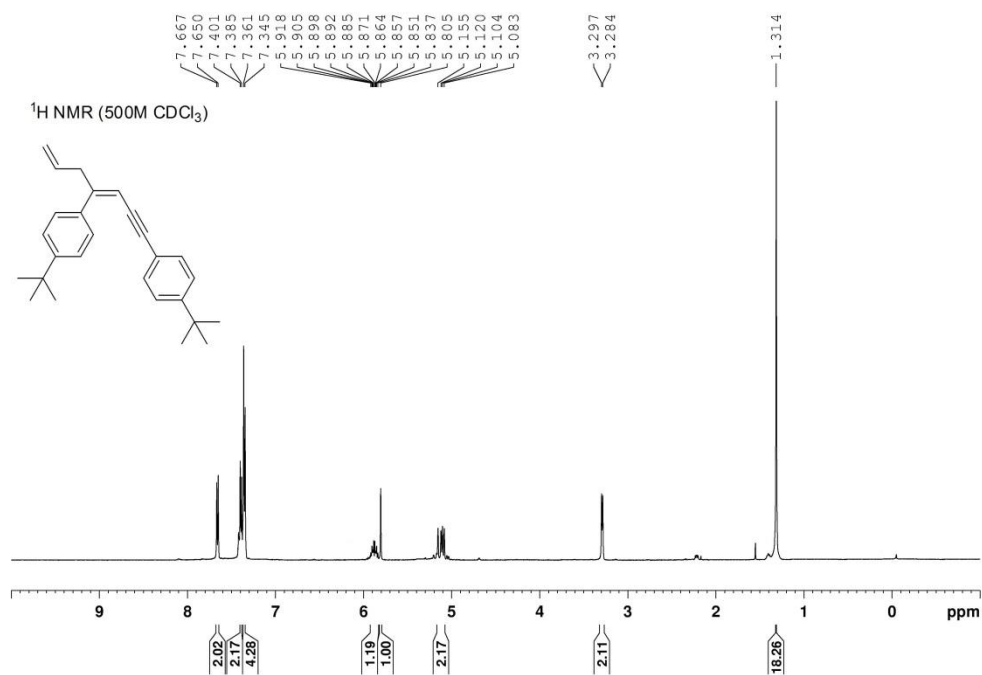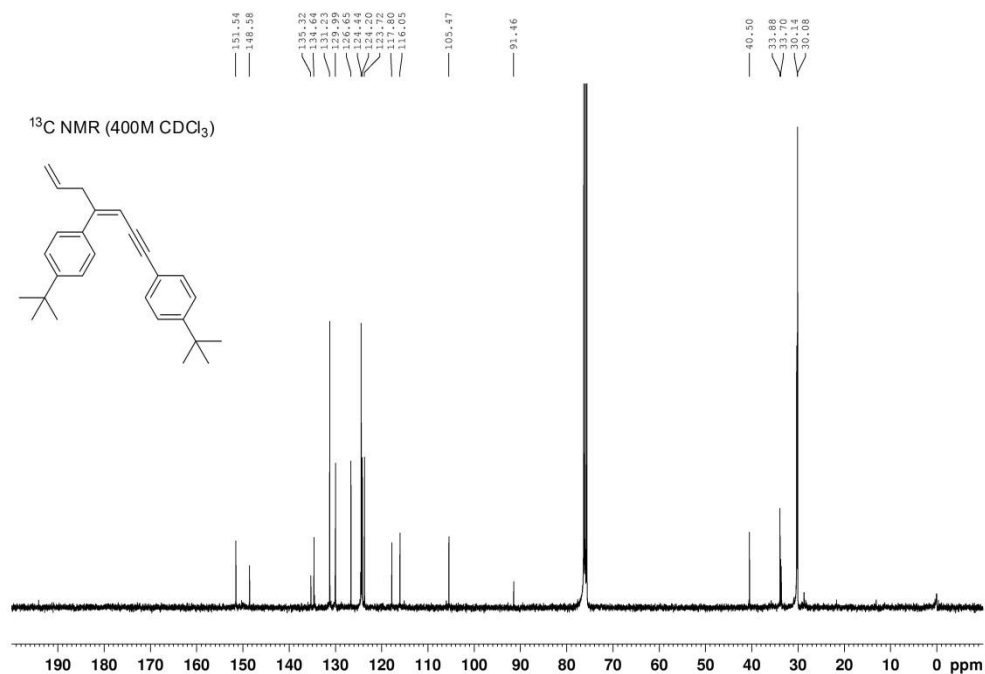

**(Z)-4,4'-(hepta-3,6-dien-1-yne-1,4-diyl)bis(methoxybenzene) (3m)**

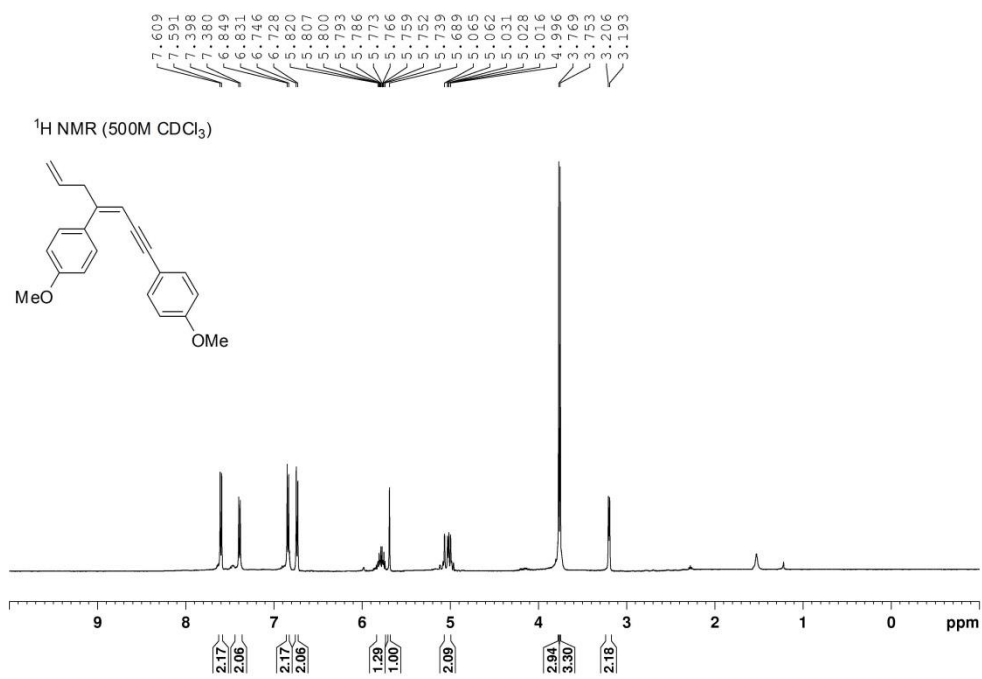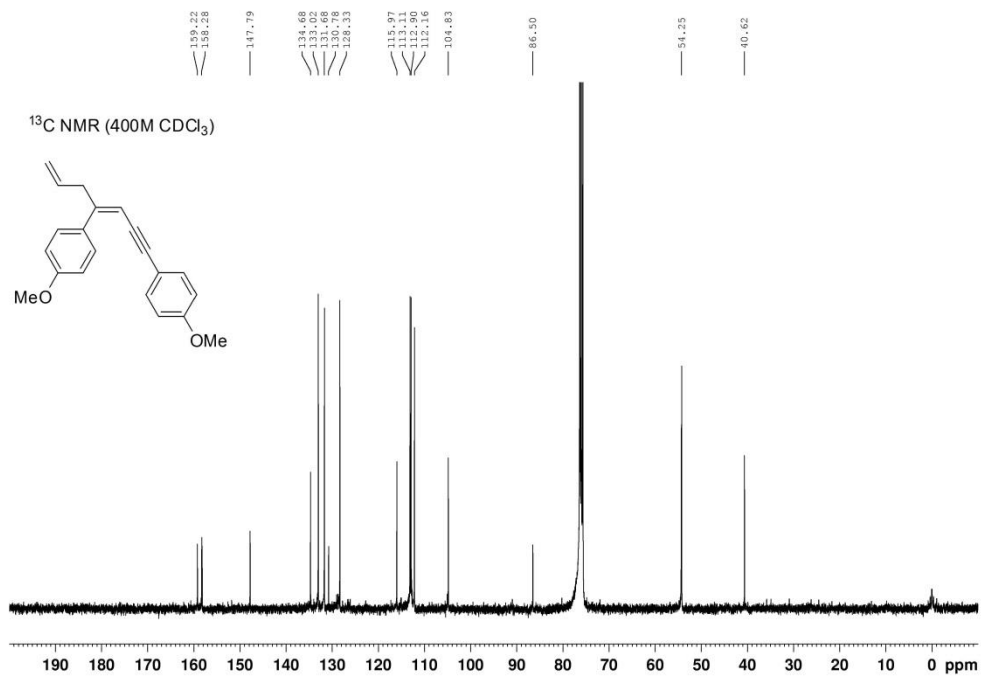

**(Z)-3,3'-(hepta-3,6-dien-1-yne-1,4-diyl)dithiophene (3n)**

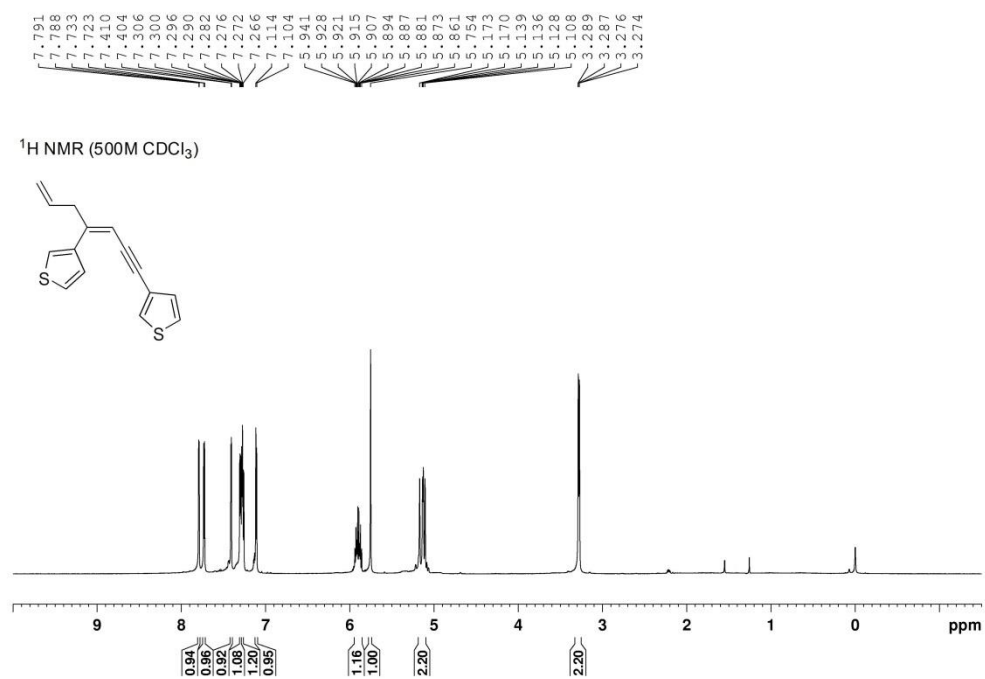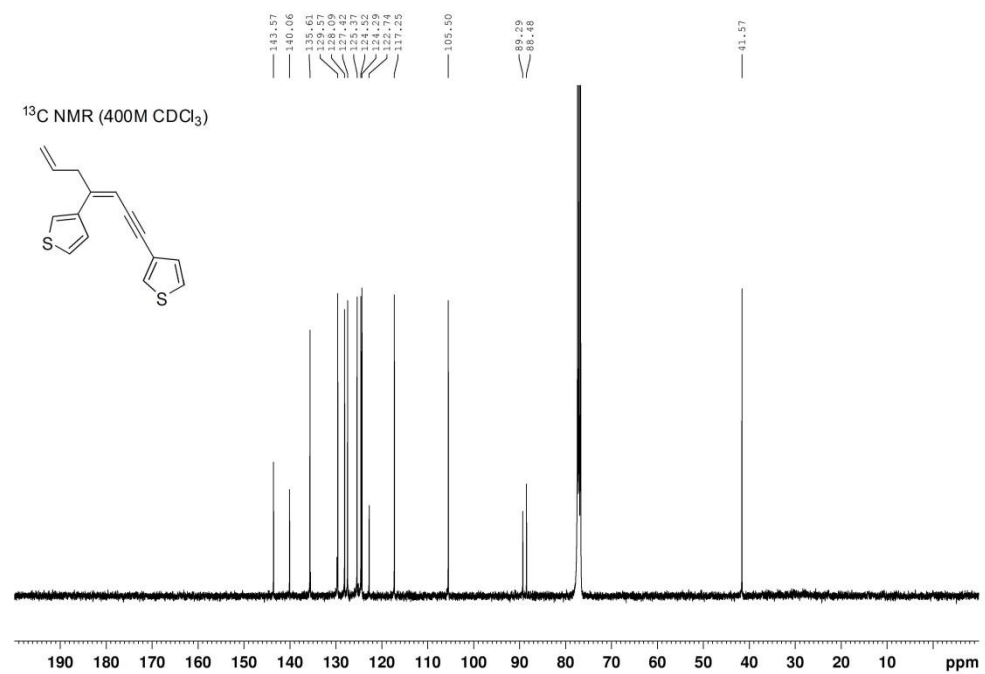

**(Z)-dimethyl 4,4'-(hepta-3,6-dien-1-yne-1,4-diyl)dibenzoate (3o)**

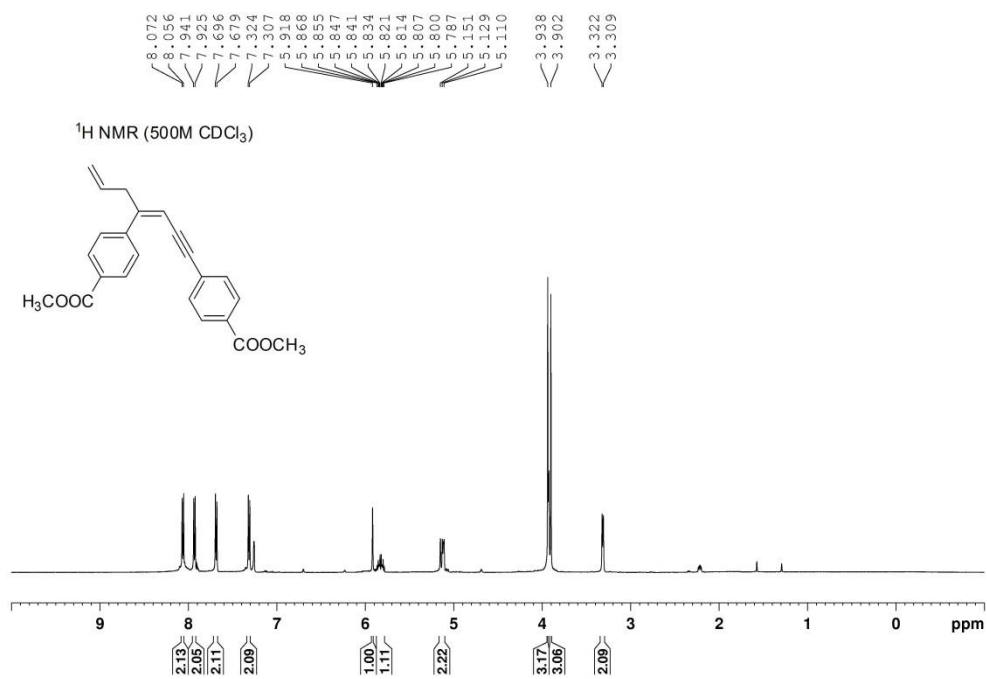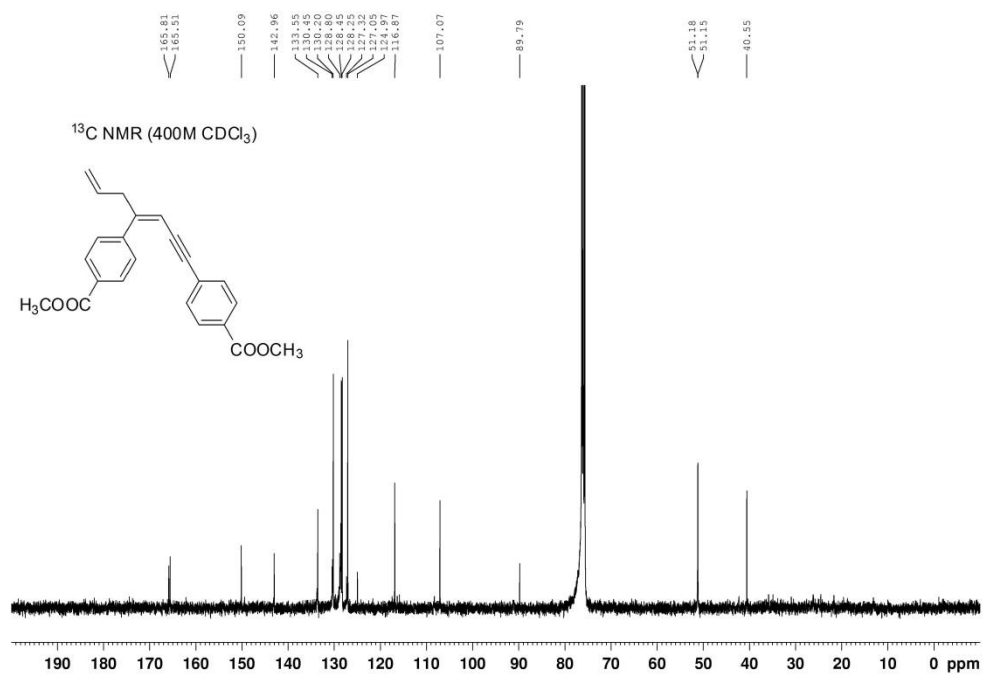

Supplement: d1qo01928g1.pdf [file d1qo01928g1.pdf]
